1 **Conservation of spatiotemporal DNA replication origin and terminus**  
2 **segregation patterns in *Sinorhizobium meliloti* with re-engineered bi- and**  
3 **monopartite genomes**

4 Marcel Wagner<sup>1,2</sup>, Johannes Döhlemann<sup>1,2</sup>, David Geisel<sup>3</sup>, Patrick Sobetzko<sup>1</sup>, Javier Serrania<sup>1,2</sup>, Peter  
5 Lenz<sup>1,3</sup> and Anke Becker<sup>1,2\*</sup>

6 <sup>1</sup>Center for Synthetic Microbiology (SYNMIKRO), Marburg, Germany

7 <sup>2</sup>Department of Biology, Philipps-Universität Marburg, Marburg, Germany

8 <sup>3</sup>Department of Physics, Philipps-Universität Marburg, Marburg, Germany

9 Keywords: *Sinorhizobium meliloti*, genome restructuring, replicon fusion, multi-replication origin  
10 chromosome, spatiotemporal dynamics of genomic loci

11 \*Correspondence: [anke.becker@synmikro.uni-marburg.de](mailto:anke.becker@synmikro.uni-marburg.de)

12 ■ **ABSTRACT**

13 While the vast majority of bacterial genomic DNA molecules contain a single origin of replication, some  
14 natural isolates and engineered strains were reported to contain chromosomes derived from cointegration  
15 events of multiple replicons. We investigated effects of multiple DNA replication origins and terminus  
16 regions on spatial DNA organization and spatiotemporal replicon segregation in the alphaproteobacterium  
17 *Sinorhizobium meliloti*. Strains with a bi- and monopartite genome configuration were constructed by  
18 Cre/*lox*-mediated site-specific fusions of the secondary replicons pSymA and pSymB, and of the  
19 chromosome, pSymA and pSymB. The design of these strains maintained replicore ratios, GC skew, as  
20 well as distribution and orientation of KOPS and coding sequences. Growth of these strains was essentially  
21 unaffected, except for high salt conditions. Replication initiation at the three origins as well as key features  
22 of spatial organization and spatiotemporal segregation were maintained in the triple-replicon fusion strain.  
23 Cell growth was slowed down by deleting, either individually or together, the pSymA- and pSymB-derived  
24 replication initiator encoding *repC* genes with their intrinsic origin of replication from the dual or triple  
25 replicon cointegrates, respectively. Replication of the triple cointegrate, characterized by the chromosomal  
26 *oriC* as sole origin and a strongly disbalanced replicore ratio, terminated in the original chromosomal *terC*  
27 region, suggesting a replication trap. Progression of replication of the longer replicore was not blocked  
28 but impaired, possibly due to the retained secondary replicon's terminus regions and reverse alignment of  
29 replicore-orienting sequence features following from the deletion of replication origins. Moreover, during  
30 the cell cycle of this strain, *oriC* aberrantly localized and served as replication initiation site in the mid cell  
31 area of the cell with the oldest cell pole. Growth deficiency of this strain was attenuated by a suppressor  
32 mutation causing amino acid substitution R436H in the cell cycle histidine kinase CckA.

33 ■ **AUTHOR SUMMARY**

34 To proliferate, any cell must reliably replicate its genomic DNA and allocate copies to the future cell  
35 compartments prior to cell division. While eukaryotic cells typically use multiple origins of replication per  
36 chromosome to initiate replication, bacteria usually rely on a single origin of replication per genomic DNA

37 molecule. About 10 % of total-genome-sequenced bacterial species maintain multipartite genomes.  
38 Derivatives of such bacterial species with fused genomic DNA molecules – either natural bacterial isolates  
39 or engineered strains – demonstrate that bacteria can handle genomic DNA molecules with multiple origins  
40 of replication in their cell cycle. In our study we show that a cointegrate of three genomic replicons  
41 maintains key features of spatial organization and segregation dynamics of each replicon in the  
42 alphaproteobacterium *Sinorhizobium meliloti*. The spatial association of origin and terminus regions to  
43 specific cell areas, as well as preserving typical features of bacterial genome organization, such as  
44 replicore ratio and the distribution and DNA strand specificity of coding sequences and replicore-  
45 orienting sequence motifs, are likely key to maintaining genomic cointegrates with multiple replication  
46 origins in a bacterial cell without major loss of cell fitness.

## 47 ■ INTRODUCTION

48 About 10 % of the whole genome-sequenced bacterial species represented in databases maintain  
49 multipartite genomic DNA [1]. Their genome architectures are diverse in terms of number and size of DNA  
50 molecules maintained. In addition to the main chromosome, these bacteria harbor one or more large  
51 secondary replicons classified as secondary chromosomes, chromids or megaplasms according to origin  
52 type, gene content, and size [1,2].

53 In contrast to chromosomes of eukaryotes and archaea that commonly have multiple origins of  
54 replication, bidirectional replication of bacterial main chromosomes is usually initiated at a single origin of  
55 replication (*ori*) and finishes in a termination zone (*ter*) when converging replication forks meet [3-5].  
56 Nonetheless, several reports support that DNA molecules with more than one origin of replication can be  
57 maintained in bacteria. Strand asymmetry patterns suggest multiple origins of replication in genomes of the  
58  $\gamma$ -proteobacterial endosymbiont *Wigglesworthia glossinidia* and the cyanobacterium *Synechocystis* 6803  
59 [6]. DNA molecules with two or three origins of replication, which originated from cointegration events of  
60 two or three replicons, were reported for natural strain isolates of the  $\gamma$ -proteobacterium *Vibrio cholerae*  
61 and the  $\alpha$ -proteobacterium *Sinorhizobium meliloti*, respectively [7-9]. Further evidence for the possibility

62 of maintaining a chromosome with multiple origins of replication derives from engineered chromosomes  
63 of the  $\gamma$ -proteobacterium *Escherichia coli* that in addition to the native *oriC* locus carry one or two extra  
64 copies of this origin of replication [11,12].

65 In bacterial cells, the genomic DNA is highly organized, and replication and segregation are coordinated  
66 in space and time [13]. Common patterns in rod-shaped cells are longitudinal arrangement of the main  
67 chromosome with the origin of replication at the old cell pole and the terminus region at the new cell pole  
68 (*ori-ter*), or transverse arrangement (left-*ori*-right) placing the two replichores in the left and right halves  
69 of the cell. The former is e.g. characteristic of *V. cholerae* and the  $\alpha$ -proteobacteria *Caulobacter crescentus*,  
70 *S. meliloti* and *Brucella abortus*, and the latter of slow-growing *E. coli* [14-16]. In *B. abortus* harboring a  
71 main chromosome and a chromid, and in *S. meliloti* possessing a main chromosome, a chromid and a  
72 megaplasmid, the *oris* of the secondary replicons localize subpolar to the old cell pole in newborn cells [16-  
73 18]. This spatial arrangement differs from that of the chromid (Chr II) in *V. cholerae*. Here, in G<sub>1</sub>-phase  
74 cells, the *ori* of Chr II localizes at midcell and its *ter* closer to the cell's new pole [19]. In *V. cholerae* and  
75 *S. meliloti*, it was shown that segregation of the replicons follows a predominant order, with segregation of  
76 the *ori* of the main chromosome preceding that of the secondary replicon(s) [18,20].

77 This raises questions about the effects of multiple *oris* and *ters* in cointegrated replicons on spatial DNA  
78 organization and spatiotemporal patterns of replicon segregation. In this study, we addressed these  
79 questions in *S. meliloti* Rm1021, which carries the main chromosome (3.65 Mbp), megaplasmid pSymA  
80 (1.35 Mbp) and chromid pSymB (1.68 Mbp) [21]. Vertical transmission of the secondary replicons is  
81 mediated by replicon-specific *repABC* loci [22] that provide a complete replication and segregation system  
82 [18]. Beside the DNA replication initiator protein RepC, the *repABC* operon encodes the ParAB-type  
83 partitioning proteins RepAB. Together with centromer-like sequences (*parS*) these proteins are crucial for  
84 segregation of replicated DNA [23]. In contrast to the chromosomal origin (*oriC*) characterized by specific  
85 elements including DnaA-boxes and DNA unwinding elements (DUE) [5], the origins of *repABC*-type  
86 secondary replicons (*oriV*) are located within an AT rich region of RepC [24].

87 In this study, we constructed *S. meliloti* strains with a bi- and monopartite genome configuration with  
88 multiple *oris* or a single *ori* per genomic DNA molecule. We show that a cointegrate of three genomic  
89 replicons that per design preserved typical features of bacterial genome organization, such as replicore  
90 ratio, and distribution and orientation of coding sequences and replicore-orienting sequence elements,  
91 maintained key features of spatial organization and segregation dynamics of each replicon. Furthermore,  
92 we show that an engineered strain with monopartite genome configuration, harboring *oriC* as sole origin of  
93 replication and characterized by a strongly unbalanced replicore ratio is viable, but impaired in growth.  
94 We report evidence for replication termination in the original *terC* region in this strain and that this  
95 engineered genome configuration affects polar localization of *oriC* and replication progression. A  
96 suppressor mutation in the cell cycle histidine kinase CckA was identified that likely attenuates growth  
97 deficiency of this strain.

## 98 ■ RESULTS

### 99 Replicon fusions preserving strand asymmetry patterns

100 To study the properties of a triple-replication origin chromosome in *S. meliloti* in terms of spatial  
101 organization and spatiotemporal dynamics as well as propagation stability during the cell cycle, we merged  
102 the tripartite genome of this  $\alpha$ -proteobacterium into a single DNA molecule. Targeted fusions of the three  
103 replicons were achieved by Cre/*lox*-mediated recombination in *S. meliloti* SmCre $\Delta$ hsdR [25]. This strain,  
104 further referred to as wild type in this study, lacks *hsdR* encoding a restriction endonuclease and carries  
105 chromosomally integrated *cre* encoding Cre recombinase. This recombinase catalyzes site-specific  
106 recombination of DNA between *loxP* sites. Replicon cointegrations sporadically occurring in *S. meliloti* by  
107 recombination between *nodPQ1* and *nodPQ2* as well as between the *algI* paralogues *SMB20843* and  
108 *SMc01551* [7] acted as blueprint for selection of the fusion sites.

109 Following integration of *lox* sites, in close proximity to *nodPQ1* and *nodPQ2*, megaplasmid pSymA and  
110 chromid pSymB were initially merged to generate pSymAB by induced Cre/*lox*-mediated site-specific  
111 recombination. Thus, the resulting strain SmAB harbored a bipartite genome composed of the main

112 chromosome and pSymAB (Fig 1A; S1 Fig). Following integration of a *lox* site in vicinity to both *algI*  
113 paralogues on chromosome and pSymAB, and induced Cre/*lox*-mediated site-specific recombination, these  
114 genomic elements were merged, giving rise to a single genomic DNA molecule in strain SmABC (Fig 1A,  
115 S1 Fig). To reduce the possibility of direct revertants after the A-B and AB-C fusion steps, we locked the  
116 genomic design by deletion of the remaining active *lox* site on both the AB and ABC fused replicons. This  
117 deletion was achieved by homologous recombination between the paralogous *nodPQ* and *algI* genes  
118 flanking each of these *lox* sites, respectively (S1 Fig). Thus, in SmAB and SmABC, the AB and ABC DNA  
119 molecules each contained only one remaining inactive *lox* site with downstream antibiotic resistance  
120 marker. Fusion sites, correct genomic arrangements, and genome sequence of SmAB and SmABC were  
121 validated using PCR (S2 Fig), Pulsed-field gel electrophoresis (PFGE) (Fig 1B), and Illumina paired-end  
122 sequencing, respectively.

123 SmAB and SmABC genomic DNA configurations were designed to display wild type-like replichore  
124 ratios and distribution of GC content (Fig 1A; S3 and S4 Fig). Replichore orientation was reported to be  
125 defined by factors such as KOPS (FtsK orienting polar sequence) motifs and orientation of strongly  
126 expressed genes, both mostly situated on the leading DNA strand [26-28]. Each of the *S. meliloti* replichores  
127 contains a higher number of protein-coding genes on the leading than on the lagging strand (S5 Fig). This  
128 bias was preserved in SmAB and SmABC, even though two and three of the six replichores, respectively,  
129 were composed of segments originating from two or three different replicons of the wild type (Fig 1C).  
130 Also, the distribution of sequence motifs matching the *E. coli* KOPS consensus reflected the replicon  
131 structure and showed a strand asymmetry pattern with increasing motif density from *ori* towards *ter* in the  
132 replicons of wild type, SmAB and SmABC (Fig 1D; S6 Fig).

### 133 **Cell growth and morphology were not affected by the genome rearrangements**

134 Like other  $\alpha$ -proteobacteria, *S. meliloti* undergoes asymmetric cell division which leads to siblings of  
135 uneven cell size [18,29,30]. Cell shape and size of the *S. meliloti* replicon fusion strains and the wild type  
136 were indistinguishable by microscopic analysis (Fig 2A). A few cells with strongly asymmetrically placed

137 constriction sites, probably resulting in minicells after cell division, were observed in cultures of the  
138 *S. meliloti* wild type, SmAB and SmABC strains in TY (complex) and high salt TY media (S7A Fig). A  
139 quantitative analysis identified a maximum of about 0.3 % minicells in wild type and replicon fusion strain  
140 cultures (S7B and S7C Fig). Because of the very low number of minicells in the cell populations, clear  
141 differences in the percentage of minicells in cultures of these strains in both media is not evident. When  
142 cultivated in TY or low phosphate minimal MOPS (defined) media, cell growth of both replicon fusion  
143 strains was similar to that of the wild type (Fig 2B). To analyze the effect of high-salinity and hyperosmotic  
144 stress on these strains, TY medium was supplemented with 0.4 M NaCl and 0.5 M sucrose, respectively.  
145 Compared to the wild type, SmAB and SmABC appeared only slightly impaired in growth in these media  
146 (Fig 2B). Supplementing TY medium with 0.6 M NaCl or 0.7 M sucrose enhanced the difference in growth  
147 between wild type and replicon fusion strains (S8B Fig).

#### 148 **Origins of secondary replicons became expendable in the strain with monopartite genome** 149 **configuration**

150 We asked if a single replication origin would be sufficient for proper vertical transmission of the AB and  
151 ABC DNA molecules in SmAB or SmABC. We attempted to inactivate *oriC* by deletion of various DNA  
152 fragments in the annotated *oriC* region including putative DnaA boxes [31] (S9 Fig). However, our efforts  
153 to delete these DNA regions were not successful. Further, we aimed to inactivate *oriA* and *oriB* individually  
154 in the wild type and SmAB, and individually or together in SmABC. To this end, the *repB-repC* intergenic  
155 region and the *repC* coding region (*repC2* of pSymA and *repC1* of pSymB) were targeted for deletion  
156 (S10A Fig). In the wild type, deletion of these *repC* regions was not achieved. However, SmAB or SmABC  
157 lacking either of these regions (SmAB $\Delta$ repC1, SmAB $\Delta$ repC2 or SmABC $\Delta$ repC1, SmABC $\Delta$ repC2) or  
158 SmABC lacking both these regions (SmABC $\Delta$ oriV) were obtained (S10B Fig). The configuration of the  
159 genomic DNA in all these strains was validated by PFGE (S10C Fig). Illumina sequencing verified the  
160 intended genetic changes in SmAB, SmABC and SmABC $\Delta$ oriV, and revealed modifications resulting from  
161 the construction process (S6 and S7 Table). Apart from these modifications, we identified only up to three

162 single nucleotide variations (SNVs) per engineered genome compared to the wild type genome (S8 Table),  
163 which we suppose are unlikely to be relevant to bacterial strain survival or fitness.

164 The sequential inactivation of the secondary replicon *oriVs* was associated with a gradually increasing  
165 growth defect, which appeared to correlate with the number of *oriVs* per DNA molecule. Deletion of a  
166 single *repC* copy in SmAB resulted in a more severe growth defect than in SmABC, whose monopartite  
167 genomic DNA still carried two replication origins (*repC* and *oriC*) after deletion of one *repC*. However,  
168 deletion of both *repC* copies in SmABC caused the most severe growth defect (Fig 3A), even though cell  
169 morphology was inconspicuous in snap shot analysis (Fig 3B).

170 To test if replication is initiated at all three *oris* and to determine the replication termination regions of  
171 the triple replicon fusion molecule in SmABC a Marker Frequency Analysis (MFA) was performed. The  
172 MFA data indicate that all three *oris* mediated bidirectional replication (Fig 3C; S11B Fig). Furthermore,  
173 this data suggests that replication terminated in regions close to or overlapping the MFA minima for  
174 chromosome, pSymA and pSymB identified in the parental strain with tripartite genome configuration  
175 (S11A Fig), which roughly match with predicted *ter* regions [32]. MFA analysis of SmABC $\Delta$ *oriV* shows  
176 clear sequence read enrichment with a maximum at *oriC* but no additional enrichment maxima at the  
177 mutated *repABAC* ( $\Delta$ *oriA*/ $\Delta$ *oriB*) regions. The latter suggests loss of function of *oriA* and *oriB* in  
178 SmABC $\Delta$ *oriV* when compared to SmABC (Fig 3C). This analysis also suggests replication termination in  
179 a region close to or overlapping *terC*, which separates two replichores largely differing in size with a ratio  
180 of approximately 3:1. (S11C Fig). Plateaus or decrease in locus frequencies, including  $\Delta$ *oriB*, *terB* and *terA*  
181 regions, might indicate replication obstacles in the single-replicon monopartite genomic DNA. In addition,  
182 fluorescence microscopy-based analysis of mCherry-fused DNA polymerase III beta subunit DnaN over  
183 the cell cycle revealed a maximum of two fluorescent foci in cells with monopartite genomic DNA  
184 containing *oriC* as sole replication origin in contrast to four to five foci observed in parallel when all three  
185 *oris* were available (S12 Fig). This is indicative of a reduced number of replisome formations in  
186 SmABC $\Delta$ *oriV*. Collectively, MFA and this microscopy data indicate that SmABC $\Delta$ *oriV* contains a single  
187 6.7 Mbp replicon.



188 **A triple color fluorescent labeling system for simultaneous microscopic monitoring of *oriC***  
189 **and two further freely selectable genomic loci**

190 To enable live cell imaging analyses of spatial organization and spatiotemporal dynamics of the rearranged  
191 genomic DNA in the replicon fusion strains SmAB, SmABC and SmABC $\Delta$ oriV, we established a triple  
192 color fluorescent labeling system. As this required using several antibiotic resistance markers, we  
193 eliminated by homologous recombination the inactive *lox* sites together with the downstream resistance  
194 markers that remained from the replicon fusion procedure in the AB and ABC DNA molecules (S1 and  
195 S13A Fig). This gave rise to derivatives of SmAB, SmABC and SmABC $\Delta$ oriV termed SmAB $\Delta$ R,  
196 SmABC $\Delta$ R and SmABC $\Delta$ oriV $\Delta$ R, respectively. The genome architecture of these strains was validated by  
197 PFGE (S13B Fig) and Illumina genome sequencing.

198 ParB is known to specifically recognize and bind cognate *parS* sequences typically located around the  
199 chromosomal origin of replication in various bacterial species [33]. This protein was previously reported to  
200 be essential in *S. meliloti* [34] and used as marker for *oriC* in this bacterium [18,35]. Indeed, we found good  
201 evidence for *C. crescentus*-like *parS* sites localized close to *oriC* in *S. meliloti* (S14C Fig). In our study, we  
202 employed a ParB-cerulean fusion to label *oriC*. To this end, *parB* at its native chromosomal locus was  
203 replaced by a *parB-cerulean* fusion in SmAB $\Delta$ R, SmABC $\Delta$ R, SmABC $\Delta$ oriV $\Delta$ R, and the wild type  
204 (S14A Fig). Growth of the parental strains and corresponding derivative strains was indistinguishable in  
205 TY medium (S14B Fig), suggesting that the ParB-cerulean protein was functional.

206 In addition, a fluorescence repressor operator system (FROS) for labeling of two freely selectable  
207 genomic loci was established. This system combined *tetO* and *lacO* operator arrays [36] with *tetR-mVenus*  
208 and *lacI-mCherry* placed under control of the P<sub>tauA</sub> promoter on the replicative and mobilizable low copy  
209 vector pFROS (S14A Fig). In this setup, the basal activity of P<sub>tauA</sub> [37] was sufficient to generate a well  
210 detectable fluorescent signal over analysis periods of at least up to 6 hours in our study (S14D Fig), which  
211 makes the system particularly suitable for time lapse applications.

212 **Polar or subpolar localization of the three replication origins at the old cell pole and polar**  
213 **positioning of *terC* at the new cell pole was conserved in SmABC**

214 We asked for the effect of replicon fusions on the spatial organization of the genomic DNA in *S. meliloti*  
215 by comparing monopartite and tripartite genome architectures. To this end, SmABCΔR and wild type  
216 derivatives, both carrying the *parB-cerulean* marker, were equipped with *tetO* and *lacO* arrays for  
217 simultaneous labeling of *oriC/oriA/oriB*, *oriC/terC*, *oriC/oriA/terA* and *oriC/oriB/terB* (Fig 4A; S16A Fig).  
218 In addition, we constructed derivatives of both strains for simultaneous labeling of *oriC* via ParB-cerulean  
219 and one further genomic locus either by integration of a *tetO* or *lacO* array. The labeled positions included  
220 genomic loci adjacent to the sites used for fusion of the replicons (Fig 4A; S16A Fig). Prior to fluorescence  
221 microscopy analysis, these strains were validated by PFGE for their correct genome configuration (S15 and  
222 S18 Fig), and pFROS was introduced to mediate fluorescent labeling of the genomically integrated *tetO*  
223 and *lacO* arrays. For subcellular 2D mapping of the labeled genomic loci by snap-shot imaging of live cells,  
224 we filtered cells by size with a maximum cell length of 2.0 μm and displaying a single ParB-Cerulean-  
225 mediated fluorescent focus in one of the two cell pole regions only (Fig 4B). This configuration is indicative  
226 of a G<sub>1</sub>-phase cell with *oriC* localized at the old cell pole [17,18]. On average, the cell lengths were 1.8 ±  
227 0.1 μm for both wild type and SmABCΔR.

228 Plotting the subcellular location of individual markers as function of the genomic position showed a  
229 tripartite triangle pattern, indicating arrangement of DNA segments between *ori* and *ter* along the  
230 longitudinal cell axis (Fig 4C). In wild type and SmABCΔR, *oriC* and *oriA/oriB* occupied polar and  
231 subpolar areas, respectively (S16B Fig). As expected from our filtering approach and in agreement with  
232 previous reports [17, 18], in both strains, the *oriC* signal showed a very low positional variance at one cell  
233 pole (S1 Table). Subpolar localization of *oriA* and *oriB* signals with similar variances in both strains  
234 suggests a spatial confinement of these elements to this region of the cell (S1 Table).

235 The *terC* fluorescence signal was enriched with low positional variance at the cell pole opposite to the  
236 pole exhibiting the ParB-cerulean signal in wild type and SmABCΔR (S16B Fig; S1 Table). However, the  
237 average spatial positions of *terA* and *terB* signals differed between these strains (S16B Fig; S1 Table).  
238 Changes in spatial positions were also found for further markers. We particularly observed differences  
239 between the average positions of the fluorescent signals for markers 5/6, 9/10 and 15/16 flanking the

240 replicon fusions sites in SmABCΔR compared to the wild type (Fig 4C; S1 Table). This was expected since  
241 the markers of each pair are situated on different DNA molecules in the wild type, whereas they were  
242 brought into close proximity by the replicon fusions. In contrast, the average subcellular signal positions of  
243 chromosomal markers 2, 3 and 18, which map in close vicinity to *oriC* or *terC*, did not much differ between  
244 both strains (Fig 4D; S1 Table).

245 Tethering of *ori* and *ter* regions to factors localized at cell poles was previously reported for several  
246 bacteria [38-42]. To test if the spatial organization of DNA in SmABCΔR is only determined by the  
247 positioning of locally confined origin and terminus regions and the inherent features of the DNA as semi-  
248 flexible polymer of compacted units, we simulated the DNA arrangement for genome configurations  
249 differing in number and position of confined loci. We expanded a previously described model [43] by  
250 implementing not only one origin and one terminus as possible fixpoints, but three of each. By ergodic  
251 sampling over 200 configurations (Fig 4E) using the MOS-algorithm [44] the average genomic  
252 organization was obtained.

253 Initially, we generated a model including only *oriC* (S17A Fig) and *oriC/terC* (S17B Fig) as anchoring  
254 points of the 6.7 Mbp DNA molecule at the old and the new cell poles. We found that confining these two  
255 loci are not sufficient to describe the spatial arrangement of pSymA- and pSymB-derived DNA. By  
256 anchoring of all three origins to the experimentally determined average subcellular position, we gained a  
257 ternary model structure with highly variable DNA segments between the three points (S17C Fig). However,  
258 in this model structure, the DNA segment between *oriC* and *oriB* did not extend up to the opposite cell  
259 pole. We then confined *terC* to the new cell pole, and *oriC* to the polar, and *oriA* and *oriB* to the subpolar  
260 regions of the old cell pole (S17D Fig) since these loci showed the smallest positional variance in the  
261 experimental data (S17E Fig). With these four anchored points the generated model structure already  
262 reflected the experimentally determined positions of loci 2, 3 and 5 as well as locus 6 located on the  
263 chromosome and pSymB, respectively. However, it did not describe the experimentally determined average  
264 localization of *terA* and *terB*. Loci close to *terA* and *terB* showed a high positional variance in the

265 experimental data (S17E Fig). By a spatial confinement of *terA* and *terB* within the experimental data  
266 variance we gained a tripartite triangle structure (Fig 4F), albeit this model did not reproduce the  
267 experimentally determined average localization of loci 13 to 18.

### 268 **Spatiotemporal dynamics of origin and terminus regions in replicon fusions strains**

269 To study the effect of bi- and monopartite genome configurations and reduced number of replication  
270 initiation sites on DNA segregation, we analyzed the spatiotemporal dynamics of the replication origin and  
271 terminus regions in SmAB $\Delta$ R, SmABC $\Delta$ R and SmABC $\Delta$ oriV $\Delta$ R in comparison to the wild type. For this  
272 purpose, we completed the set of strains carrying *tetO* and *lacO* arrays for labeling of replication origin and  
273 terminus regions. To this end, we integrated the corresponding constructs into the appropriate genomic  
274 positions of SmAB $\Delta$ R and SmABC $\Delta$ oriV $\Delta$ R, validated the genome configurations of the resulting strains  
275 by PFGE (S18 Fig), and introduced pFROS. At the level of individual cells, microscopic snap-shot and  
276 time lapse data of combinations of labeled *oriC/oriA/oriB*, *oriC/terC*, *oriC/oriA/terA* and *oriC/oriB/terB*  
277 were generated.

278 **Spatiotemporal choreography of origins and termini was similar in the replicon fusion strains and**  
279 **wild type.** Initially, the spatiotemporal dynamics of fluorescently labeled *ori* and *ter* loci in mother cells of  
280 *S. meliloti* wild type, SmAB $\Delta$ R and SmABC $\Delta$ R were analyzed. For each individual cell analyzed, cell cycle  
281 duration and cell size were normalized to 100 % (0/100 % – completion of cell division) and to 1 (0 – old  
282 cell pole, 1 – new cell pole), respectively, to facilitate comparative analyses. In agreement with our previous  
283 study [18], in these three strains, two *oriC* foci, indicative of the start of chromosome segregation, were  
284 observed at the old cell pole (Fig 5B; S3 Table) shortly after completion of cell division (first quarter of the  
285 cell cycle, Fig 5A). This was followed by translocation of one of these *oriC* foci (*oriC2*) to the new cell  
286 pole (S19B, S21B and S23B Fig), and *oriC* segregation was mostly completed before cells reached the  
287 second quarter of the cell cycle (Fig 5Ci). In the three strains, *oriA* and *oriB* foci translocated from a  
288 subpolar region to the midcell area where duplication of both was observed after completion of *oriC*  
289 partitioning (Fig 5B). The visible segregation of these foci occurred in the second quarter of the cell cycle

290 (Fig 5A), on average  $41.0 \pm 12.4$  min (*oriA*) and  $48.2 \pm 11.2$  min (*oriB*) after *oriC* foci duplication  
291 (S29A Fig). Progression of this segregation resulted in localization of both an *oriA* and *oriB* copy in each  
292 subpolar region of the future sibling cells (S19A, S21A and S23A Fig).

293 Translocation of the *terC* foci from the new pole to midcell started in the three strains approximately in  
294 the middle of the cell cycle (Fig 5C). Two *terC* foci were observed at midcell for the first time in the last  
295 quarter of the cell cycle before cell division (Fig 5B and 5C). *terA* and *terB* foci already localized in the  
296 midcell area before duplicated foci were observed in this region (Fig 5B). Doubling of *terA* and *terB* foci  
297 was observed prior to *terC* segregation in the third quarter of the cell cycle (Fig 5A). In the daughter cells,  
298 choreography of individual *ori* and *ter* foci was similar to that in the mother cells described above (S27 and  
299 S28 Fig; S4 and S5 Table).

300 We asked if there is a preferential order of *oriA* and *oriB* segregation at the level of individual wild type,  
301 SmAB $\Delta$ R and SmABC $\Delta$ R cells. Upon detailed examination, we found that duplication of *oriA* and *oriB*  
302 foci in both mother and daughter cells was very close in time (S19A, S21A and S23A Fig), and was  
303 observed either simultaneously (S29B Fig) or sequentially (Fig 5D), with *oriA* starting segregation before  
304 *oriB* in the majority of cells. In up to a fifth of wild type, SmAB $\Delta$ R and SmABC $\Delta$ R cells analyzed (n=200  
305 each), we found the doubling of *oriA* and *oriB* foci within the same time frame of 5 minutes (S29C Fig). In  
306 the remaining proportion of cells that showed sequential segregation of these origins, *oriA* segregation  
307 preceded that of *oriB* in three-fourth of these cells (Fig 5E). In conclusion, the time-lapse analyses of fusion  
308 strains SmAB $\Delta$ R and SmABC $\Delta$ R indicate that choreography of origin and terminus regions, encompassing  
309 position and order of origin segregation events, resembles that of the wild type with a tripartite genome  
310 configuration.

311 **Chronology of segregation and spatial position of *oriC* and  $\Delta$ *oriA/B* regions are altered in**  
312 **SmABC $\Delta$ *oriV* $\Delta$ R.** Strain SmABC $\Delta$ *oriV* $\Delta$ R carries monopartite genomic DNA containing *oriC* but lacking  
313 both secondary replicon origins (*repA1B1AC1*,  $\Delta$ *oriB* and *repA2B2AC2*,  $\Delta$ *oriA*). We studied the

314 segregation chronology of active *oriC*, inactive  $\Delta oriA/B$ , and terminus regions in this strain to learn about  
315 the segregation properties of the 6.7 Mbp single replicon.

316 In an initial fluorescence microscopy snapshot series, we analyzed putative G<sub>1</sub>-phase SmABC $\Delta oriV\Delta R$   
317 cells filtered with a cut-off of 2.0  $\mu\text{m}$  cell length and deduced the relative distance of *oriC* and both  $\Delta oriA/B$   
318 foci to the cell equator. Striking differences were found between *oriC* localization in SmABC $\Delta oriV\Delta R$   
319 compared to wild type, SmAB $\Delta R$  and SmABC $\Delta R$  cells. In SmABC $\Delta oriV\Delta R$  cells, the distribution of *oriC*  
320 localization showed two high-density clusters (S30 Fig), one in the cell pole (0.5 to 1 and -0.5 to -1) and  
321 one in the midcell area (0 to 0.5 and 0 to -0.5), representing about 65 % and 35 % of the cells analyzed,  
322 respectively (Fig 6A). In contrast, wild type, SmAB $\Delta R$  and SmABC $\Delta R$  showed *oriC* foci clustering in the  
323 cell pole area of 89 to 94 % of the cells analyzed (Fig 6A). We also observed that in SmABC $\Delta oriV\Delta R$ ,  
324 both  $\Delta oriA/B$  foci localized more frequently in the midcell area than in the cell pole area (S30 Fig) and  
325 therefore analyzed the subcellular localization of these loci in correlation to *oriC* localization (S31 Fig).  
326 Whereas only about 12 to 18 % of wild type, SmAB $\Delta R$  and SmABC $\Delta R$  cells showed one or both  $\Delta oriA/B$   
327 foci together with *oriC* in the midcell area, this was the case for 43 to 47 % of SmABC $\Delta oriV\Delta R$  cells  
328 (Fig 6B). Collectively, this data suggests aberrant localization of *oriC* in more than one third of  
329 SmABC $\Delta oriV\Delta R$  G<sub>1</sub>-phase cells.

330 To follow up on this observation, we performed time-lapse fluorescence microscopy. Analysis of this  
331 data revealed two different *oriC* localization patterns in the two sibling cells (Fig 6C). In three fourth of  
332 SmABC $\Delta oriV\Delta R$  cells analyzed (n = 400), we found *oriC* localizing in one sibling in the midcell area  
333 (sibling 1) and in the other sibling at the cell pole (sibling 2) right before cell division. We analyzed 20 of  
334 the sibling 1 cells for the time point of visible *oriC* foci segregation and observed that this event occurred  
335 in the first cell cycle quarter (Fig 5A). Following cell cycle progression of 80 sibling 1 cells revealed that  
336 visible *oriC* foci segregation occurred in the midcell area (Fig 6D). In 81.3 % of these sibling 1 cells, right  
337 before cell division, segregation of *oriC* foci resulted in localization of one *oriC* focus (*oriC2*) at the new  
338 cell pole and the other (*oriC1*) in the mid-area of the mother cell compartment (S32 Fig). In the sibling 2

339 cells, we found duplication of the *oriC* focus (*oriC1*) at the old cell pole followed by translocation of one  
340 of the *oriC* foci (*oriC2*) to the new pole (Fig 6D). Right before cell division, this resulted in *oriC2* foci  
341 localized at the new cell pole in 86.3% of the cells and *oriC1* localized either at the old cell pole or in the  
342 mid-area of the mother cell compartment in 30.0% and 70.0% of the cells, respectively (S32 Fig). We  
343 identified the sibling 2 cells as the daughter cells since they most frequently adopted the *oriC* localization  
344 pattern of the previous sibling 1 cell (i.e. mother cell) after one cell cycle. A schematic summary of the  
345 predominant *oriC* segregation patterns in mother and daughter cells is shown in Fig 6E.

346 Moreover, we found that in mostly all mother cells analyzed displaying aberrant *oriC* localization the  
347  $\Delta oriA$  and delta  $\Delta oriB$  regions lost their subpolar localization (S25 and S26 Fig). This is in agreement with  
348 our observation from the snapshot analysis. In addition to the change in the spatial position of the first  
349 visible segregation of fluorescently labeled *oriC*, we also observed a change for  $\Delta oriB$ . Whereas in wild  
350 type, SmAB $\Delta$ R and SmABC $\Delta$ R cells, duplication of labeled *oriB* occurred mostly at midcell,  $\Delta oriB$   
351 duplication in SmABC $\Delta oriV\Delta$ R cells was observed in the new cell pole compartment (Fig 5B).

352 In SmABC $\Delta oriV\Delta$ R, wild type, SmAB $\Delta$ R and SmABC $\Delta$ R mother cells, we observed two different  
353 temporal patterns of fluorescent foci duplication associated to *ori* and *ter* regions. Cells of the latter three  
354 strains showed arrival of the *oriC2* focus at the new cell pole approximately in the end of the first cell cycle  
355 quarter and *terC* focus translocation from the new cell pole to the midcell area shortly after the midpoint of  
356 the cell cycle. In SmABC $\Delta oriV\Delta$ R cells, however, *terC* focus translocation occurred already in the  
357 beginning of the second cell cycle quarter, whereas no clear difference was observed for the timepoint of  
358 *oriC2* focus arrival at the new cell pole (Fig 5Cii). In these cells, doubling of *terC* and also of *terA* foci was  
359 predominantly observed in the second cell cycle quarter, whereas these events occurred in the last and third  
360 cell cycle quarter, respectively, in the three other strains (Fig 5A). Moreover, two foci representing the  
361  $\Delta oriA$  regions were observed for the first time in SmABC $\Delta oriV\Delta$ R cells shortly after the halfway point of  
362 the cell cycle, in contrast to duplication of the corresponding regions in cells of the other strains in the  
363 second quarter of the cell cycle (Fig 5A). Thus, in SmABC $\Delta oriV\Delta$ R cells, visible segregation of *terA*

364 occurred before that of the  $\Delta oriA$  region. Duplication of *terB* and  $\Delta oriB$  foci was observed mostly at the  
365 end of the third cell cycle quarter, with duplication of *terB* in SmABC $\Delta oriV\Delta R$  cells occurring on average  
366 before that of  $\Delta oriB$  (Fig.5A). In wild type, SmAB $\Delta R$  and SmABC $\Delta R$  cells, duplication of *oriB* was  
367 observed already in the second cell cycle quarter followed by *terB* duplication in the third cell cycle quarter.  
368 Similar differences in chronology of foci duplication were also observed when daughter cells of  
369 SmABC $\Delta oriV\Delta R$  were compared with wild type, SmAB $\Delta R$  and SmABC $\Delta R$  (S27 Fig; S4 Table).

370 **A missense mutation in cell cycle kinase-encoding *cckA* is not responsible for aberrant *ori***  
371 **localizations in SmABC $\Delta oriV\Delta R$  but probably increased fitness of this strain**

372 In addition to genome sequencing of SmAB, SmABC, and SmABC $\Delta oriV$  (see above), we also determined  
373 the genome sequence of SmAB $\Delta R$ , SmABC $\Delta R$ , and SmABC $\Delta oriV\Delta R$  (S8 Table). In particular, a SNV in  
374 the coding sequence *SMc00471* of the cell cycle histidine kinase CckA in SmABC $\Delta oriV\Delta R$  attracted our  
375 attention. This SNV that causes amino acid substitution R436H (S33A Fig; S8 Table) was not found in the  
376 precursor strains.

377 To test whether this missense mutation was responsible for the aberrant *oriC* localization pattern in  
378 strain SmABC $\Delta oriV\Delta R$  we attempted to revert the SNV to the wild-type *cckA* sequence in this strain, and  
379 failed. We then introduced this missense mutation into the wild type and SmABC $\Delta R$  and analyzed the  
380 localization of *oriC* right before cell division in G<sub>1</sub>-phase cells, using ParB-Cerlulean for fluorescent  
381 labeling (Fig 7A; S33B and S33C Fig). Regarding polar (approx. 90 %) and midcell (approx. 10 %)   
382 localization of the ParB-Cerlulean mediated fluorescent focus, we found no difference between the strains  
383 carrying the SNV in *cckA* and the corresponding strains with wild type *cckA* (Fig 7A). However, in this  
384 comparison, growth of the strains with CckA<sup>R436H</sup> was slightly reduced (S33D Fig).

385 In addition, we used ParB-Cerlulean to analyze the *oriC* localization pattern in SmABC $\Delta oriV$ , the direct  
386 precursor of SmABC $\Delta oriV\Delta R$ . SmABC $\Delta oriV$  carries the *cckA* wild type sequence and is already deleted  
387 for both secondary replicon replication origins ( $\Delta oriA/B$ ). We found that the *oriC* localization pattern in  
388 SmABC $\Delta oriV$  already deviates from the wild type-like pattern in SmABC, which has three intact



389 replication origins (Fig 7B). This implies that CckA<sup>R436H</sup> did not cause the observed mislocalization of *oriC*  
390 in SmABCΔ*oriV*ΔR. However, we found a strong difference in growth between SmABCΔ*oriV* (CckA) and  
391 SmABCΔ*oriV*ΔR (CckA<sup>R436H</sup>) (S33E Fig.), indicating that the *cckA*<sub>R436H</sub> allele mitigates growth  
392 deficiencies of SmABCΔ*oriV*ΔR.

## 393 ■ DISCUSSION

394 Although the universal single DNA replication origin paradigm for genomic DNA molecules seems to be  
395 true for most bacterial species, natural strain isolates containing chromosomes derived from cointegration  
396 of two or three replicons were found [7-10]. Previous studies of engineered *E. coli* strains indicate that  
397 disturbing chromosome organization patterns by integration of one or more additional *oriC* copies or re-  
398 localization of *oriC* to ectopic locations can cause replication-transcription conflicts and issues with  
399 replication fork trap regions, which affect DNA replication and segregation, and promote selection of  
400 phenotype-moderating genome rearrangements and genetic suppressions [11,12,45-48]. In naturally  
401 occurring single-chromosome Vibrio (NSCV) strains of *V. cholerae*, a second origin was found to be either  
402 active or silenced depending on the position of the cointegration event [49], whereas in laboratory-generated  
403 fusions the Chr2 replication machinery was not functional [50,51]. These findings motivated us to ask about  
404 the effects of multiple replication origins and terminus regions in cointegrated bacterial replicons on spatial  
405 DNA organization and spatiotemporal patterns of replicon segregation.

406 We addressed these questions by converting the *S. meliloti* tripartite genome configuration into bi- and  
407 monopartite configurations. This set-up differed in several features from the engineered *E. coli* strains with  
408 multiple copies of *oriC* in the main chromosome. The *S. meliloti* replicon fusion strains have three different  
409 distinct origins of replication, each associated with a replicon-specific partitioning system [23]. Differential  
410 regulation of the activities of these origins promotes sequential replication initiation in the wild type during  
411 the cell cycle [18]. In the fused replicons, we aimed at retaining organizational properties of the replicons,  
412 such as GC skew, and distribution and orientation of KOPS and coding sequences. This was also the case  
413 for a natural occurring *S. meliloti* triple replicon cointegrate [7], which we approximately reproduced. Our

414 replicon fusion strategy by site-specific recombination reduced the likelihood of homologous  
415 recombination-mediated revertants, reported for the natural occurring *S. meliloti* triple replicon cointegrate  
416 [7]. This enabled investigating spatial DNA organization and spatiotemporal segregation patterns of a  
417 monopartite triple-replicon bacterial genome, mostly independent of aberrant replicon symmetry patterns  
418 and spontaneously occurring genome rearrangements in the studied strains.

419 **Spatial organization and spatiotemporal segregation patterns of the engineered monopartite**  
420 **triple-replicon genome.** We found that DNA replication initiated at all three origins in the triple replicon  
421 fusion strain. Conservation of replichore asymmetries in the *oriC-oriB* and *oriB-oriA* segments, and  
422 termination regions close to or overlapping the termination regions of the wild type argue for retained  
423 differences in the progression of the replication forks, e.g. by replication fork trapping sequences that slow  
424 down or stall the replisome [52]. This is contrary to what has been observed with *V. cholerae* [53]. The  
425 conservation of *terC* in the single replicon strain SmABC $\Delta$ oriV $\Delta$ R, with even extremely skewed  
426 replichores, provides clear evidence for mechanisms defining this region for termination in the replication  
427 process and for spatial organization.

428 Compared to the wild type, the engineered strain was unremarkable in morphology and growth behavior  
429 in complex medium, indicating that the new genome configuration does not significantly interfere with cell  
430 proliferation processes. However, high-salinity and hyperosmotic stress weakly reduced growth. High salt  
431 conditions are known to influence the supercoiling state of genomic DNA [54], thus, the triple replicon  
432 fusion strain may be somewhat less robust to conditions affecting DNA condensation.

433 In many bacteria, tethering of the chromosomal origin and terminus regions to cell poles plays an  
434 important role for spatial chromosome organization and segregation [55]. Previously, a longitudinal *oriC*  
435 (old pole)-*terC* (new pole) configuration of the main chromosome and subpolar localization (old pole) of  
436 the *oris* of the secondary replicons was reported for *S. meliloti* G<sub>1</sub>-phase cells with tripartite genome  
437 configuration [17,18]. Combining fluorescence microscopy and DNA random walk modeling, we found  
438 that polar localization of *oriC* and *terC* as well as subpolar localization of *oriA* and *oriB* are maintained in

439 cells of the *S. meliloti* triple replicon fusion strain, and thus significantly contribute to spatial organization  
440 of the genomic DNA.

441 In many bacterial species with polarly localized *oriC*, the DNA-binding CTPase ParB [56, 57] binds to  
442 clusters of *parS* sequences in the *ori* region. It tethers this DNA region to a cell pole-associated protein  
443 scaffold once sister *ori* segregation is finished, acting as a landmark for the following segregation of the  
444 bulk of chromosomal DNA [56]. At both poles of *C. crescentus* cells, PopZ forms a scaffold interacting  
445 with ParB-*parS* [39,40]. In *Agrobacterium tumefaciens* (*Rhizobium radiobacter*), which like *S. meliloti*  
446 belongs to the *Rhizobiaceae*, the PopZ ortholog was observed at the new pole shortly after cell division  
447 [58]. This makes it unlikely that PopZ is involved in the spatial confinement of *oriC* in the old cell pole  
448 region in this species. Similar to its functional role in *C. crescentus*, PopZ may play a role in binding one  
449 *oriC* copy to the new cell pole in the process of chromosome partitioning [39,40]. In *A. tumefaciens*, the  
450 polar organelle development (Pod) protein PodJ localizes at the old pole [59] and is essential for tethering  
451 the *oris* of its main circular and its secondary linear chromosome to this pole in early phases of the cell  
452 cycle [60]. However, in *S. meliloti*, the ortholog PodJ1, which is a truncated version of PodJ, was only  
453 detected at the new cell pole [61], making its involvement in anchoring *oriC* to the old pole unlikely.  
454 Therefore, the pole organizing factor(s) tethering *oriC* to the old cell pole remain(s) to be identified in *S.*  
455 *meliloti*.

456 Factors that mediate spatial confinement of *oriA* and *oriB* to subpolar regions in *S. meliloti* are also still  
457 unknown. In *Myxococcus xanthus*, bactofilins that assemble into elongated scaffolds restrain the ParABS  
458 chromosome segregation machinery and thereby the chromosomal origin of replication to the subpolar  
459 region [62]. It is conceivable that similar cytoskeletal filaments mediate spatial confinement of *oriA* and  
460 *oriB* to the subpolar region in *S. meliloti*. This might also explain the greater cell-to-cell variance in spatial  
461 positions of these *oris* in the subpolar region compared to the spatially less variable polar localization of  
462 *oriC*.

463 Localization of *terC* at the old cell pole of G<sub>1</sub>-phase cells showed a very low cell-to-cell variance of  
464 spatial positions in the triple replicon fusion strain, which is likely mediated by orthologs of factors known

465 to be involved binding *terC* at the old cell pole in *C. crescentus* (see discussion below) [63, 64]. In contrast,  
466 cell-to-cell variance of the spatial positions of the terminus regions of the secondary replicons was high.  
467 Nevertheless, constraints on the diffusion of *terA* and *terB* within the limits of the observed variance were  
468 necessary for our *in silico* simulations to approximately reproduce the experimental observations. The  
469 spatial shift of *terA* in the triple replicon fusion strain argues against active positioning. We therefore  
470 speculate that these regions are subject to constraints on mobility, possibly due to a gradient of potential  
471 binding sites or inherent properties of the cytoplasm, such as molecular crowding [65,66] and viscosity  
472 influencing size-dependent motions of molecules [67].

473 The almost complete correspondence of the spatiotemporal segregation pattern of the origin and  
474 terminus regions of the three replicons in the wild type and in the triple replicon fusion strain indicates that  
475 the regulation of replication initiation and the processes relevant to segregation have been conserved.  
476 Consistent with a previous study [18], duplication and segregation of *oriC* commenced before these  
477 processes started for the *oris* of the secondary replicons, with a strong preference for *oriA* preceding *oriB*.  
478 However, in the current study, which examined a much larger number of cells compared with the previous  
479 study [18], the previously observed temporal order of duplication and segregation first of *oriA* and then of  
480 *oriB* was less stringent. The mechanism of coordination of replication initiation of secondary replicons with  
481 that of the chromosome in *S. meliloti* is still unknown. Transcriptome data [68] and DNA methylation  
482 pattern [69] of a *S. meliloti* wild type strain also suggest an asynchronous replication of the chromosome  
483 and the secondary replicons. Stronger upregulation of *repC2* (pSymA) than *repC1* (pSymB) transcripts  
484 during the cell cycle [68] might indicate a threshold-like mechanism contributing to the temporal preference  
485 for *oriA* replication initiation. In *C. crescentus*, the interplay of CcrM with GcrA is suggested to mediate  
486 methylation state dependent regulation of gene expression [70,71]. Since in *S. meliloti*, these two cell cycle  
487 regulators are conserved [70,72] and recognition motifs of the N6-adenosine methyltransferase CcrM were  
488 found upstream of cell cycle-regulated genes of the *repABC* loci on the secondary replicons [69],  
489 methylation state dependent regulation of gene expression is hypothesized to also contribute to the  
490 integration of these replicons in the cell cycle.

491 We propose that translocation of *terC* from the new cell pole to midcell, observed approximately  
492 midway of the cell cycle in the *S. meliloti* wild type and triple fusion strain, is controlled by a mechanism  
493 similar to that suggested for *C. crescentus*. For most of the cell cycle, the replication terminus of the *C.*  
494 *crescentus* chromosome is colocalizing with FtsZ, which accumulates at the new cell pole in G<sub>1</sub>-phase cells  
495 and forms the Z-ring in the midcell region towards the end of the cell cycle [63]. Spatial coupling of both  
496 is mediated by interaction of the terminus recognition protein ZapT [63], the Z-ring associated proteins  
497 ZapA [73] and ZauP [64,74]. A potential homolog of ZapA (SMc03976) was reported in *S. meliloti* [75]  
498 and we found a candidate for a ZapT homologue (SMc01787) by sequence comparisons.

499 **Spatial organization and spatiotemporal segregation patterns of the engineered monopartite**  
500 **single-replicon genome.** Replicon fusions made initiator protein-encoding *repC* genes including the  
501 replication origins of the secondary replicons dispensable. This suggests that replisomes that initiated  
502 replication at *oriC* were not ultimately stalled in the original pSymA- and pSymB-derived terminus regions.  
503 Nevertheless, sequential deletion of secondary replicon-derived *oris* in strains with bi- or monopartite  
504 genome configuration was associated with reduced growth, possibly due to replication obstacles arising  
505 from the new replicore structures.

506 Consistent with *oriC* and *terC* providing the main landmarks for DNA replication and segregation  
507 processes in the monopartite single-replicon strain, chronology of segregation of  $\Delta oriA/B$  and *ter* loci  
508 changed compared to the monopartite triple-replicon strain. Segregation of these loci correlated with the  
509 position on the replicon sequence and the distance to *oriC*. Remarkably, we found that *oriC* and both  
510  $\Delta oriA/B$  loci lost polar and subpolar localization, respectively, in mother cells of the monopartite single-  
511 replicon strain. This suggests that the *repC* and *oriV* deletions directly or indirectly affect mechanisms  
512 relevant for anchoring of these sequence elements.

513 Based on our data, we hypothesize that the R436H amino acid substitution in CckA is a suppressor  
514 mutation that attenuates the growth deficiencies of the *S. meliloti* strain with monopartite single-replicon  
515 genome configuration constructed in this study. Cell cycle regulation by the CckA-ChpT-CtrA signaling  
516 pathway is wide-spread in  $\alpha$ -proteobacteria [76]. The CckA phosphorelay controls the phosphorylation

517 status of ChpT which in turn regulates activity and stability of the cell cycle master regulator CtrA through  
518 phosphorylation [77]. CckA phosphatase activity enables initiation of DNA replication through  
519 dephosphorylation and degradation of CtrA [77,78]. The *S. meliloti* (S33A Fig) and *C. crescentus* CckA  
520 domain composition [79] is very similar. The R436H substitution in *S. meliloti* CckA locates in one of the  
521 PAS domains, which in *C. crescentus* were shown to regulate switching between the CckA kinase and  
522 phosphatase activities [79,80]. Narayanan and coworkers [81] identified a point mutation in the PAS-B  
523 domain of *C. crescentus* CckA that suppresses a topoisomerase IV inhibitor-induced chromosome  
524 segregation defect, possibly by slowing down the chromosome replication cycle. CckA<sup>R436H</sup> is therefore  
525 proposed to mitigate chromosome replication and/or segregation defects in a similar manner. We speculate  
526 that the R436H substitution promotes kinase or reduces phosphatase activity of *S. meliloti* CckA, which  
527 results in higher levels of CtrA-P repressing replication initiation and slowing down the cell cycle.

## 528 ■ MATERIALS AND METHODS

529 **Bacterial strains and cultivation conditions.** Bacterial strains used in this study are derivatives of *E. coli*  
530 K12 and *S. meliloti* Rm1021 (S9 Table). *E. coli* was grown at 37°C in lysogeny broth (LB) medium [82,  
531 83]. *S. meliloti* strains were cultivated at 30°C in either tryptone yeast extract (TY) medium [84] or modified  
532 morpholinepropanesulfonic acid (MOPS)-buffered minimal medium [85] at 200 rpm. If required, the  
533 following antibiotics were used accordingly: gentamicin (8 µg/ml for *E. coli*, 30 µg/ml for *S. meliloti*),  
534 kanamycin (50 µg/ml for *E. coli*, 200 µg/ml for *S. meliloti*), streptomycin (600 µg/ml for *S. meliloti*),  
535 spectinomycin (100 µg/ml for *E. coli*, 200 µg/ml for *S. meliloti*) or tetracycline (10 µg/ml for *E. coli* and 3  
536 µg/ml for *S. meliloti*). Solid medium was supplemented with 1.5% (w/v) BD Difco™ technical agar (Fisher  
537 Scientific).

538 **DNA manipulation and plasmid extraction.** Plasmids used in this study are listed in S10 Table. Standard  
539 molecular techniques were employed for cloning and transfer of nucleic acids [83]. DNA fragments were  
540 PCR amplified using Q5® High-Fidelity DNA Polymerase (New England Biolabs) or Taq DNA  
541 Polymerase (New England Biolabs). DNA oligonucleotides were provided by Sigma-Aldrich (USA) and

542 Integrated DNA Technologies (USA) (S13 Table). For DNA purification and gel extractions the E.Z.N.A.®  
543 Cycle-Pure Kit (Omega Bio-Tek) and illustra™ GFX™ PCR DNA and Gel Band Purification Kit (GE  
544 Healthcare Life Sciences) were used, respectively. For phosphorylation of the 5' hydroxyl terminus of PCR  
545 amplicons and oligonucleotides T4 Polynucleotide Kinase (Thermo Scientific) was applied.  
546 Dephosphorylation of DNA ends was performed by use of FastAP™ Thermosensitive Alkaline Phosphatase  
547 (Thermo Scientific). The fill in of 5'-overhangs in double stranded DNA to form blunt ends was achieved  
548 using the large fragment of DNA Polymerase I (Klenow fragment) (Thermo Scientific). T4 Ligase (Thermo  
549 Scientific) was used for ligation. Plasmid DNA was isolated using the “E.Z.N.A. Plasmid Mini Kit” (Omega  
550 Bio-Tek). All enzymatic catalyzation and purification steps were performed according to the  
551 manufacturer's protocols and instructions. For sequence verification of plasmid and amplified DNA the  
552 sanger sequencing service of Eurofins Genomics (Germany) was used. For detailed information on the  
553 construction of individual plasmids refer to S12 Table.

554 **Strain construction.** Strains generated in this study are listed in S11 Table. Transfer of plasmids to  
555 *S. meliloti* was achieved by conjugation using *E. coli* S17-1 [86] or by electroporation as previously  
556 described [25]. Cells for electroporation were prepared as described in Ferri et al. [87]. Markerless  
557 integrations through double homologous recombination were carried out using pK18mobsacB derivatives  
558 and sucrose selection [88].

559 On the basis of a Cre/lox toolbox and *S. meliloti* Rm1021 derivative SmCreΔhsdR [25] the tripartite genome  
560 was merged in two consecutive steps. First, pSymA and pSymB were fused with each other, giving rise to  
561 the megaplasmid hybrid pSymAB harbored by *S. meliloti* strain SmAB. Therefore, pK18mobsacB  
562 derivatives pJD98 and pJD99 were used to integrate lox sites and antibiotic selection markers into  
563 SmCreΔhsdR for the site-specific recombination. After removal of active lox sites, SmAB was sequentially  
564 transformed with constructs pJD130 and pJD126 again providing lox sites and an additional antibiotic  
565 selection marker for integration of the chromosome and pSymB. Cre-mediated integration of pSymAB into  
566 the chromosome gave rise to SmABC with monopartite genome configuration. Cre/lox applications were

567 performed as described before [25]. Illustration of SmAB and SmABC strain generation and detailed  
568 information about the construction process is given in S1 Fig and S11 Table, respectively.

569 In order to remove DNA replication origins of strain SmABC, deletion constructs pJD201 and pJD202 were  
570 used for sequential excision of the megaplasmid-encoded copies of *repC* and corresponding *repBC*  
571 intergenic regions. The deletion of both regions in SmABC resulted in strain SmABC $\Delta$ oriV. By use of  
572 deletion constructs pJD222 and pJD229, *S. meliloti* strains SmAB, SmABC and SmABC $\Delta$ oriV were further  
573 cured from spectinomycin and gentamicin resistance cassettes, respectively, giving rise to strains  
574 SmAB $\Delta$ R, SmABC $\Delta$ R and SmABC $\Delta$ oriV $\Delta$ R accessible for constructs of the replicon labeling system. For  
575 *in vivo* studies of DNA organization and spatiotemporal dynamics of origin and terminus by fluorescence  
576 microscopy, a triple label system based on the fluorescent reporter gene fusions *tetR-mVenus* and *lacI-*  
577 *mCherry* (derived from the FROS [36]) and *parB-cerulean* was developed. Initially, *S. meliloti* strains  
578 SmCre $\Delta$ hsdR, SmAB $\Delta$ R, SmABC $\Delta$ R and SmABC $\Delta$ oriV $\Delta$ R were transformed with pMW198. Deletion of  
579 the plasmid backbone via sucrose selection resulted in an in-frame fusion of the native *parB* gene with  
580 *cerulean* (*oriC* label). For analysis of the replisome formation and dynamics pK19ms DnaN-mCherry [18]  
581 was used for markerless integration of the fluorophore. pK18mobsacB derivatives pMW186 (providing 120  
582 copies of the *tetO* array, *tetO*<sub>120</sub>) and pMW188 (carrying 120 copies of the *lacO* array, *lacO*<sub>120</sub>) were used  
583 for marker-free labeling of *oriA* (SMa2383 - SMa2385 intergenic region) and *oriB* (SMb20041 - SMb20042  
584 intergenic region), respectively. pK18mob2 derivatives pJD169 (*tetO*<sub>120</sub>), pMW193 (*lacO*<sub>120</sub>) and pJD170  
585 (*tetO*<sub>120</sub>) enabled labeling of *terC* (SMc01205 - SMc01204 intergenic region), *terA* (SMa1188 (*nosX*) -  
586 SMa1191 (*hmp*) intergenic region) and *terB* (SMb21555 (*kefB2*) - SMb21556 intergenic region),  
587 respectively. Regarding the *ori/ter* labeling, *oriC* pre-labeled strains were transformed with pJD169  
588 (*oriC/terC* labelling), pMW186 and pMW193 (*oriC/oriA/terA* labelling), or pMW188 and pJD170  
589 (*oriC/oriB/terB* labelling). Additionally, integrative pK18mob2 derivatives pAM25, pAM30, pAM31,  
590 pAM32 (Km<sup>R</sup>, *tetO*<sub>120</sub>) and pACYC177 derivatives pAM7, pAM13, pAM45, pAM47, pAM68, pAM69,  
591 pAM70 and pAM72 (Gm<sup>R</sup>, *lacO*<sub>120</sub>) were used to label further genomic loci in context of the genome  
592 organization analysis. Repair of CckA<sup>R436H</sup> in SmABC $\Delta$ oriV $\Delta$ R was attempted using a double homologous



593 recombination strategy integrating pMW257 for markerless replacement of the *cckA* SNV (C→T) with wild  
594 type coding sequence of *cckA*. Reproduction of the CckA<sup>R436H</sup> mutation in strains of the wild type and  
595 SmABCΔR was achieved by markerless integration of *cckA* SNV (C → T) trough pMW256. Analysis of  
596 *oriC* localization in strains SmABC and SmABCΔoriV was realized by single crossover integration of  
597 pMW261.

598 **Strain validation.** Pulsed-Field Gel Electrophoresis (PFGE) was used as method to validate the genome  
599 architecture after major fusion and integration/deletion steps. The applied PFGE protocol for DNA  
600 preparation and digestion was carried out as described for strain validations in Checcucci et al. [89]. To  
601 gain fusion strain characteristic banding patterns the restriction digestion of genomic DNA was performed  
602 with PaeI (New England Biolabs, USA). For PFGE analysis, ¼ agarose plug with treated genomic DNA  
603 was separated in an 0.7% agarose gel (Pulse Field Certified Agarose, Bio-Rad, USA) and 0.5x TBE buffer  
604 at 12°C (44.5mM Tris-HCl, 44.5mM boric acid, 1mM EDTA) using the Rotaphor® System 6.0 (Analytik  
605 Jena, Germany) according to the manufacturer's instructions. Separation of DNA fragments was achieved  
606 with 130V-100V for 50-175sec at 130°-110° (run time 18h), 130V-80V for 175sec-500sec at 110° (run  
607 time 18h) and 80V-50V for 500sec-2000sec at 106° (run time 40h) with a logarithmic course of increase or  
608 decrease between varying parameters, respectively.

609 For sequence specific analysis, including verification of proper deletions and detection of single-nucleotide  
610 variants (SNVs), all basic strains (SmCreΔhdsR, SmAB, SmABC, SmABCΔoriV, SmABΔ, SmABCΔR  
611 and SmABCΔoriVΔR) were subjected to next generation DNA sequencing using the MiSeq™ System  
612 (Illumina, USA). For preparation of genomic DNA, *S. meliloti* cells were grown in TY supplemented with  
613 appropriate antibiotics and harvested at optical density<sub>600</sub> (OD<sub>600</sub>) of 1.0 by centrifugation at 3000g (4°C).  
614 Sample preparation was performed as previously described [90]. The investigation for single nucleotide  
615 variations was carried out using the Basic Variant Detection tool (v.2.1) of CLC genomic workbench  
616 (v.20.0.4) with a minimum coverage of eight, minimum count of four and minimum frequency of 50% for  
617 mapped reads. In a next step each SNV was analysed manually by eye and additionally validated by sanger  
618 sequencing in case of questionables.

619 **Growth experiments.** Prior to inoculation, overnight cultures were washed with 0.9% NaCl and adjusted  
620 to OD<sub>600</sub> of 0.01-0.15 in TY or MOPS buffered medium supplemented with 600mg/ml streptomycin.  
621 Incubation Cultures were incubated in a 100 µl volume in a 96 well microtiter plate at 30°C and with  
622 shaking at 200 rpm. OD<sub>600</sub> of cell cultures was measured every 30 min with a microplate reader (Tecan  
623 Infinite 200 PRO, Tecan, Switzerland).

624 **Live cell microscopy and image analysis.** *S. meliloti* cell cultures were grown in TY medium (glass tubes)  
625 supplemented with suitable antibiotics to OD<sub>600</sub> of 0.25 for time lapse and OD<sub>600</sub> of 0.5 for snapshot  
626 microscopy. To enrich cultures with G<sub>1</sub>-phase cells for snapshot analysis, strains were grown to OD<sub>600</sub> of  
627 1.6 - 1.8, diluted to OD<sub>600</sub> of 0.5 and subsequently used for microscopy. 1 µl of these cultures were then  
628 placed onto 1 % (w/v) molecular biology-grade agarose (Eurogentec, Belgium) pads containing ddH<sub>2</sub>O  
629 (snap shots) or MOPS minimal medium and suitable antibiotics (time lapse), covered with a cover glass  
630 and sealed with VALAP [91]. For visual examination of *S. meliloti* cells by phase contrast and  
631 epifluorescence microscopy an Eclipse Ti-E inverse research microscope (Nikon, Japan) equipped with a  
632 100x CFI Plan Apo1 oil objective (numerical aperture of 1.45), a green DPSS solid state laser (561 nm, 50  
633 mW; Sapphire) and a multiline Argonlaser (457/488/514 nm, 65 mW; Melles Griot) with AHF HC filter  
634 sets F36-513 DAPI (excitation band pass [ex bp] 387/11 nm, beam splitter [bs] 409 nm, emission [em] bp  
635 447/60 nm), F36-504 mCherry (ex bp 562/40 nm, bs 593 nm, em 624/40 nm), F36-528 mVenus (ex bp  
636 500/24 nm, bs 520 nm, and em bp 542/27 nm) was used. Exposure times ranged from 200 ms to 2 s. Image  
637 acquisition and adjustment was done with an Andor iXon3 885 electron-multiplyingcharge-coupled device  
638 (EMCCD) camera and the software NIS-Elements v.4.13 (Nikon, Japan), respectively. Time-lapse analysis  
639 was performed at 30°C in a microscope incubator and images were acquired every 2 or 5 minutes. Analysis  
640 of snap-shot and time-lapse microscopy images was performed using ImageJ plug-in MicrobeJ [92]. G<sub>1</sub>-  
641 phase cells were filtered for a maximal length of 2.0 µm and presence a single ParB-cerulean focus  
642 indicative of non-segregated *oriC*.

643 **Marker frequency analysis.** For marker frequency analysis, *S. meliloti* strains SmABC and SmABCΔoriV  
644 were grown in 50 ml TY medium supplemented with 600 mg/ml streptomycin at an initial OD<sub>600</sub> of 0.1.

645 After incubation at 30°C and 200 rpm, samples were taken at OD<sub>600</sub> of 0.6 (exponential phase) or OD<sub>600</sub> of  
646 ~ 2.6 (overnight culture, stationary phase). Cells were harvested by centrifugation (4000 g, 4°C) and  
647 immediately frozen in liquid nitrogen. Preparation and acquisition of Illumina Miseq data were performed  
648 as previously described [90]. Paired-end reads were then mapped by the QuasR R package (v1.6.2) onto  
649 the *S. meliloti* replicons. Only unique hits were considered. Subsequently, the coverage was determined  
650 from the obtained mapped genomic DNA reads using the genomcov from the bedtools toolbox (v2.25.0).  
651 The average coverage of all samples ranged between 18 and 23. The coverage was normalized by the total  
652 coverage (sum of coverage) of each sample. To identify minimal variations in the copy number along the  
653 replicons, we used sliding window averaging. The size of the window comprised 200 kb. After averaging,  
654 the value at a certain position reflects the average coverage of about 2 % of the replicon left and right of  
655 the indicated position. This process averages out random noise and local sequence specific variation. To  
656 determine the copy number without prior information about the terminus region, the lower 10 % quantile  
657 of all windows was used to determine the reads in the terminus region. All windows were then normalized  
658 by this value, resulting in a copy number relative to the terminus region.

659 **Modeling.** For the simulations we used a model for DNA described by Buenemann and Lenz [43]. The  
660 basic assumptions of the model are 1) DNA can be modeled as a sequence of compacted units (S1 Text);  
661 2) compact units can be restricted in their spatial arrangement e.g. by the action of proteins; and 3) The  
662 measured organization of the chromosome in the cell results from averaging over many individual  
663 configurations that meet these constraints. For *C. crescentus* this model revealed that self-avoidance of  
664 DNA, specific positioning of the origin (and terminus) region and the compaction of DNA are sufficient to  
665 explain the strong linear correlation between specific positions on the chromosome and their longitudinal  
666 arrangement within the cell [43]. To predict the spatial organization of the merged replicons in the *S.*  
667 *meliloti* replicon fusion strain SmABC an expansion of the model by implementing not only one origin and  
668 one terminus as fixpoints, but three each was done. For realization, the A\* algorithm was added to the  
669 model, which made it possible to generate random walks between any number of fixed points (S2 Text).

670 **Bioinformatic analysis.** GC and GC<sup>c</sup> skew analysis of the tri-, bi- and monopartite *S. meliloti* genome was  
671 performed using GenSkew (<http://genskew.csb.univie.ac.at>, Feb. 2020). GC skew depictions of the  
672 individual replicons as shown in Fig 1 were generated using the CGView server  
673 ([http://stothard.afns.ualberta.ca/cgview\\_server/](http://stothard.afns.ualberta.ca/cgview_server/) Feb. 2020). Oligonucleotide skews for KOPS were  
674 calculated with fuzznuc ([http://emboss.toulouse.inra.fr/cgi-bin/emboss/fuzznuc?\\_pref\\_hide\\_optional=1](http://emboss.toulouse.inra.fr/cgi-bin/emboss/fuzznuc?_pref_hide_optional=1),  
675 Mar. 2020). Functional domain analysis of *S. meliloti* CckA was done using the NCBI conserved domain  
676 database (CDSEARCH/cdd) [93-95] with low complexity filter, composition-based adjustment and an E-  
677 value threshold of 0.01 (Oct. 2021).

#### 678 **Data Availability Statement.**

679 The sequence data presentet in this article are available at the ArrayExpress Archive under the accession  
680 number (*to be provided*).

#### 681 **■ ACKNOWLEDGMENTS**

682 Whole genome sequencing was performed by the Screening and Automation Technology Core Facility  
683 (SAT) of the Center for Synthetic Microbiology (SYNMIKRO). We thank Bernadette Boomers for  
684 technical assistance, Elizaveta Krol for providing primers, plasmids pG18mob-mVenus and pSRKGm-  
685 CmChr as well as for identification of a *S. meliloti* ZapT homologue, Anna Motnenko for providing pAM  
686 labeling plasmids, Yannick End for plasmid pYEM1, Vanessa Munoz-Gutierrez for providing primers and  
687 Patrick Manz for technical support related to microscopy. This study was supported by the Collaborative  
688 Research Centre TRR 174 “Spatiotemporal dynamics of bacterial cells” (German Research Foundation)  
689 and the LOEWE program of the State of Hesse (Germany).

#### 690 **■ AUTHOR CONTRIBUTIONS**

691 AB, MW and JD designed the experiments. MW and JD carried out the experiments and analyzed the  
692 experimental data. PS performed computational analysis of sequence data for MFA. MW and JS analyzed  
693 genome sequence data. DG and PL modeled the spatial organization of DNA. AB and MW wrote the paper.

694 ■ **ABBREVIATIONS**

|     |            |   |                             |
|-----|------------|---|-----------------------------|
| 695 | <i>ori</i> | - | origin                      |
| 696 | <i>ter</i> | - | terminus                    |
| 697 | SNV        | - | single nucleotide variation |
| 698 | MFA        | - | marker frequency analysis   |

699 ■ **REFERENCES**

- 700
- 701 1. Harrison PW, Lower RP, Kim NK, Young JP. Introducing the bacterial 'chromid': not a chromosome, not a plasmid.
- 702 *Trends Microbiol.* 2010 Apr;18(4):141-8. doi: 10.1016/j.tim.2009.12.010.
- 703
- 704 2. diCenzo GC, Finan TM. The divided bacterial genome: structure, function, and evolution. *Microbiol Mol Biol Rev.*
- 705 2017 Aug 9;81(3):e00019-17. doi: 10.1128/MMBR.00019-17.
- 706
- 707 3. Leonard AC, Méchali M. DNA replication origins. *Cold Spring Harb Perspect Biol.* 2013 Oct 1;5(10):a010116. doi:
- 708 10.1101/cshperspect.a010116.
- 709
- 710 4. Dewar JM, Walter JC. Mechanisms of DNA replication termination. *Nat Rev Mol Cell Biol.* 2017 Aug;18(8):507-516.
- 711 doi: 10.1038/nrm.2017.42.
- 712
- 713 5. Ekundayo B, Bleichert F. Origins of DNA replication. *PLoS Genet.* 2019 Sep 12;15(9):e1008320. doi:
- 714 10.1371/journal.pgen.1008320.
- 715
- 716 6. Xia X. DNA replication and strand asymmetry in prokaryotic and mitochondrial genomes. *Curr Genomics.* 2012
- 717 Mar;13(1):16-27. doi: 10.2174/138920212799034776.
- 718
- 719 7. Guo X, Flores M, Mavingui P, Fuentes SI, Hernández G, Dávila G, et al. Natural genomic design in *Sinorhizobium*
- 720 *meliloti*: novel genomic architectures. *Genome Res.* 2003 Aug;13(8):1810-7. doi: 10.1101/gr.1260903.
- 721
- 722 8. Chapman C, Henry M, Bishop-Lilly KA, Awosika J, Briska A, Ptashkin RN, et al. Scanning the landscape of genome
- 723 architecture of non-O1 and non-O139 *Vibrio cholerae* by whole genome mapping reveals extensive population genetic
- 724 diversity. *PLoS One.* 2015 Mar 20;10(3):e0120311. doi: 10.1371/journal.pone.0120311.
- 725
- 726 9. Xie G, Johnson SL, Davenport KW, Rajavel M, Waldminghaus T, Detter JC, et al. Exception to the rule: genomic
- 727 characterization of naturally occurring unusual *Vibrio cholerae* strains with a single chromosome. *Int J Genomics.*
- 728 2017;2017:8724304. doi: 10.1155/2017/8724304.
- 729
- 730 10. Yamamoto S, Lee KI, Morita M, Arakawa E, Izumiya H, Ohnishi M. Single circular chromosome identified from the
- 731 genome sequence of the *Vibrio cholerae* O1 bv. El Tor Ogawa strain V060002. *Genome Announc.* 2018 Jun
- 732 21;6(25):e00564-18. doi: 10.1128/genomeA.00564-18.
- 733
- 734 11. Wang X, Lesterlin C, Reyes-Lamothe R, Ball G, Sherratt DJ. Replication and segregation of an *Escherichia coli*
- 735 chromosome with two replication origins. *Proc Natl Acad Sci U S A.* 2011 Jun 28;108(26):E243-50. doi:
- 736 10.1073/pnas.1100874108.
- 737
- 738 12. Dimude JU, Stein M, Andrzejewska EE, Khalifa MS, Gajdosova A, Retkute R, et al. Origins left, right, and centre:
- 739 increasing the number of initiation sites in the *Escherichia coli* chromosome. *Genes (Basel).* 2018 Jul 27;9(8):376. doi:
- 740 10.3390/genes9080376.
- 741
- 742 13. Wang X, Montero Llopis P, Rudner DZ. Organization and segregation of bacterial chromosomes. *Nat Rev Genet.* 2013
- 743 Mar;14(3):191-203. doi: 10.1038/nrg3375.
- 744

- 745 14. Nielsen HJ, Ottesen JR, Youngren B, Austin SJ, Hansen FG. The *Escherichia coli* chromosome is organized with the  
746 left and right chromosome arms in separate cell halves. *Mol Microbiol.* 2006 Oct;62(2):331-8. doi: 10.1111/j.1365-  
747 2958.2006.05346.x.  
748
- 749 15. Viollier PH, Thanbichler M, McGrath PT, West L, Meewan M, McAdams HH, et al. Rapid and sequential movement  
750 of individual chromosomal loci to specific subcellular locations during bacterial DNA replication. *Proc Natl Acad Sci*  
751 *U S A.* 2004 Jun 22;101(25):9257-62. doi: 10.1073/pnas.0402606101.  
752
- 753 16. Deghelt M, Mullier C, Sternon JF, Francis N, Laloux G, Dotreppe D, et al. G1-arrested newborn cells are the  
754 predominant infectious form of the pathogen *Brucella abortus*. *Nat Commun.* 2014 Jul 9;5:4366. doi:  
755 10.1038/ncomms5366.  
756
- 757 17. Kahng LS, Shapiro L. Polar localization of replicon origins in the multipartite genomes of *Agrobacterium tumefaciens*  
758 and *Sinorhizobium meliloti*. *J Bacteriol.* 2003 Jun;185(11):3384-91. doi: 10.1128/JB.185.11.3384-3391.2003.  
759
- 760 18. Frage B, Döhlemann J, Robledo M, Lucena D, Sobetzko P, Graumann PL, et al. Spatiotemporal choreography of  
761 chromosome and megaplasmids in the *Sinorhizobium meliloti* cell cycle. *Mol Microbiol.* 2016 Jun;100(5):808-23. doi:  
762 10.1111/mmi.13351.  
763
- 764 19. David A, Demarre G, Muresan L, Paly E, Barre FX, Possoz C. The two Cis-acting sites, *parS1* and *oriC1*, contribute to  
765 the longitudinal organisation of *Vibrio cholerae* chromosome I. *PLoS Genet.* 2014 Jul 10;10(7):e1004448. doi:  
766 10.1371/journal.pgen.1004448.  
767
- 768 20. Rasmussen T, Jensen RB, Skovgaard O. The two chromosomes of *Vibrio cholerae* are initiated at different time points  
769 in the cell cycle. *EMBO J.* 2007 Jul 11;26(13):3124-31. doi: 10.1038/sj.emboj.7601747.  
770
- 771 21. Galibert F, Finan TM, Long SR, Puhler A, Abola P, Ampe F, et al. The composite genome of the legume symbiont  
772 *Sinorhizobium meliloti*. *Science.* 2001 Jul 27;293(5530):668-72. doi: 10.1126/science.1060966.  
773
- 774 22. Cevallos MA, Cervantes-Rivera R, Gutiérrez-Rios RM. The *repABC* plasmid family. *Plasmid.* 2008 Jul;60(1):19-37.  
775 doi: 10.1016/j.plasmid.2008.03.001.  
776
- 777 23. Pinto UM, Pappas KM, Winans SC. The ABCs of plasmid replication and segregation. *Nat Rev Microbiol.* 2012  
778 Nov;10(11):755-65. doi: 10.1038/nrmicro2882.  
779
- 780 24. Cervantes-Rivera R, Pedraza-López F, Pérez-Segura G, Cevallos MA. The replication origin of a *repABC* plasmid.  
781 *BMC Microbiol.* 2011 Jun 30;11:158. doi: 10.1186/1471-2180-11-158.  
782
- 783 25. Döhlemann J, Brennecke M, Becker A. Cloning-free genome engineering in *Sinorhizobium meliloti* advances  
784 applications of Cre/*loxP* site-specific recombination. *J Biotechnol.* 2016 Sep 10;233:160-70. doi:  
785 10.1016/j.jbiotec.2016.06.033.  
786
- 787 26. Tillier ER, Collins RA. The contributions of replication orientation, gene direction, and signal sequences to base-  
788 composition asymmetries in bacterial genomes. *J Mol Evol.* 2000 Mar;50(3):249-57. doi: 10.1007/s002399910029.  
789
- 790 27. Lobry JR, Louarn JM. Polarisation of prokaryotic chromosomes. *Curr Opin Microbiol.* 2003 Apr;6(2):101-8. doi:  
791 10.1016/s1369-5274(03)00024-9.  
792
- 793 28. Necşulea A, Lobry JR. A new method for assessing the effect of replication on DNA base composition asymmetry. *Mol*  
794 *Biol Evol.* 2007 Oct;24(10):2169-79. doi: 10.1093/molbev/msm148.  
795
- 796 29. Lam H, Matroule JY, Jacobs-Wagner C. The asymmetric spatial distribution of bacterial signal transduction proteins  
797 coordinates cell cycle events. *Dev Cell.* 2003 Jul;5(1):149-59. doi: 10.1016/s1534-5807(03)00191-6.  
798
- 799 30. Hallez R, Bellefontaine AF, Letesson JJ, De Bolle X. Morphological and functional asymmetry in alpha-proteobacteria.  
800 *Trends Microbiol.* 2004 Aug;12(8):361-5. doi: 10.1016/j.tim.2004.06.002.  
801
- 802 31. Sibley CD, MacLellan SR, Finan T. The *Sinorhizobium meliloti* chromosomal origin of replication. *Microbiology*  
803 (Reading). 2006 Feb;152(Pt 2):443-455. doi: 10.1099/mic.0.28455-0.  
804

- 805 32. Hendrickson H, Lawrence JG. Selection for chromosome architecture in bacteria. *J Mol Evol.* 2006 May;62(5):615-29.  
806 doi: 10.1007/s00239-005-0192-2.  
807
- 808 33. Livny J, Yamaichi Y, Waldor MK. Distribution of centromere-like *parS* sites in bacteria: insights from comparative  
809 genomics. *J Bacteriol.* 2007 Dec;189(23):8693-703. doi: 10.1128/JB.01239-07.  
810
- 811 34. Cowie A, Cheng J, Sibley CD, Fong Y, Zaheer R, Patten CL, et al. An integrated approach to functional genomics:  
812 construction of a novel reporter gene fusion library for *Sinorhizobium meliloti*. *Appl Environ Microbiol.* 2006  
813 Nov;72(11):7156-67. doi: 10.1128/AEM.01397-06.
- 814 35. Schäper S, Yau HCL, Krol E, Skotnicka D, Heimerl T, Gray J, et al. Seven-transmembrane receptor protein RgsP and  
815 cell wall-binding protein RgsM promote unipolar growth in *Rhizobiales*. *PLoS Genet.* 2018 Aug 13;14(8):e1007594.  
816 doi: 10.1371/journal.pgen.1007594.  
817
- 818 36. Lau IF, Filipe SR, Søballe B, Økstad OA, Barre FX, Sherratt DJ. Spatial and temporal organization of replicating  
819 *Escherichia coli* chromosomes. *Mol Microbiol.* 2003 Aug;49(3):731-43. doi: 10.1046/j.1365-2958.2003.03640.x.  
820
- 821 37. Mostafavi M, Lewis JC, Saini T, Bustamante JA, Gao IT, Tran TT, et al. Analysis of a taurine-dependent promoter in  
822 *Sinorhizobium meliloti* that offers tight modulation of gene expression. *BMC Microbiol.* 2014 Nov 25;14:295. doi:  
823 10.1186/s12866-014-0295-2.  
824
- 825 38. Ben-Yehuda S, Rudner DZ, Losick R. RacA, a bacterial protein that anchors chromosomes to the cell poles. *Science.*  
826 2003 Jan 24;299(5606):532-6. doi: 10.1126/science.1079914.  
827
- 828 39. Bowman GR, Comolli LR, Zhu J, Eckart M, Koenig M, Downing KH, et al. A polymeric protein anchors the  
829 chromosomal origin/ParB complex at a bacterial cell pole. *Cell.* 2008 Sep 19;134(6):945-55. doi:  
830 10.1016/j.cell.2008.07.015.  
831
- 832 40. Ebersbach G, Briegel A, Jensen GJ, Jacobs-Wagner C. A self-associating protein critical for chromosome attachment,  
833 division, and polar organization in *Caulobacter*. *Cell.* 2008 Sep 19;134(6):956-68. doi: 10.1016/j.cell.2008.07.016.  
834
- 835 41. Yamaichi Y, Bruckner R, Ringgaard S, Möll A, Cameron DE, Briegel A, et al. A multidomain hub anchors the  
836 chromosome segregation and chemotactic machinery to the bacterial pole. *Genes Dev.* 2012 Oct 15;26(20):2348-60.  
837 doi: 10.1101/gad.199869.112.  
838
- 839 42. Donovan C, Sieger B, Krämer R, Bramkamp M. A synthetic *Escherichia coli* system identifies a conserved origin  
840 tethering factor in Actinobacteria. *Mol Microbiol.* 2012 Apr;84(1):105-16. doi: 10.1111/j.1365-2958.2012.08011.x.  
841
- 842 43. Buenemann M, Lenz P. A geometrical model for DNA organization in bacteria. *PLoS One.* 2010 Nov 3;5(11):e13806.  
843 doi: 10.1371/journal.pone.0013806.  
844
- 845 44. Madras N, Orlitsky A, Shepp LA. Monte Carlo generation of self-avoiding walks with fixed endpoints and fixed length.  
846 *J Stat Phys.* 1990 Jan; 58:159-183. doi: 10.1007/BF01020290.  
847
- 848 45. Wang JD, Berkmen MB, Grossman AD. Genome-wide coorientation of replication and transcription reduces adverse  
849 effects on replication in *Bacillus subtilis*. *Proc Natl Acad Sci U S A.* 2007 Mar 27;104(13):5608-13. doi:  
850 10.1073/pnas.0608999104.  
851
- 852 46. Srivatsan A, Tehranchi A, MacAlpine DM, Wang JD. Co-orientation of replication and transcription preserves genome  
853 integrity. *PLoS Genet.* 2010 Jan 15;6(1):e1000810. doi: 10.1371/journal.pgen.1000810.  
854
- 855 47. Ivanova D, Taylor T, Smith SL, Dimude JU, Upton AL, Mehrjouy MM, et al. Shaping the landscape of the *Escherichia*  
856 *coli* chromosome: replication-transcription encounters in cells with an ectopic replication origin. *Nucleic Acids Res.*  
857 2015 Sep 18;43(16):7865-77. doi: 10.1093/nar/gkv704.  
858
- 859 48. Milbredt S, Farmani N, Sobetzko P, Waldminghaus T. DNA replication in engineered *Escherichia coli* genomes with  
860 extra replication origins. *ACS Synth Biol.* 2016 Oct 21;5(10):1167-1176. doi: 10.1021/acssynbio.6b00064.  
861

- 862 49. Bruhn M, Schindler D, Kemter FS, Wiley MR, Chase K, Koroleva GI, et al. Functionality of two origins of replication  
863 in *Vibrio cholerae* strains with a single chromosome. *Front Microbiol*. 2018 Nov 30;9:2932. doi:  
864 10.3389/fmicb.2018.02932.  
865
- 866 50. Val ME, Skovgaard O, Ducos-Galand M, Bland MJ, Mazel D. Genome engineering in *Vibrio cholerae*: a feasible  
867 approach to address biological issues. *PLoS Genet*. 2012 Jan;8(1):e1002472. doi: 10.1371/journal.pgen.1002472.  
868  
869
- 870 51. Val ME, Kennedy SP, Soler-Bistué AJ, Barbe V, Bouchier C, Ducos-Galand M, et al. Fuse or die: how to survive the  
871 loss of Dam in *Vibrio cholerae*. *Mol Microbiol*. 2014 Feb;91(4):665-78. doi: 10.1111/mmi.12483.  
872
- 873 52. Hill TM, Pelletier AJ, Tecklenburg ML, Kuempel PL. Identification of the DNA sequence from the *E. coli* terminus  
874 region that halts replication forks. *Cell*. 1988 Nov 4;55(3):459-66. doi: 10.1016/0092-8674(88)90032-3.  
875
- 876 53. Galli E, Ferat JL, Desfontaines JM, Val ME, Skovgaard O, Barre FX, et al. Replication termination without a  
877 replication fork trap. *Sci Rep*. 2019 Jun 5;9(1):8315. doi: 10.1038/s41598-019-43795-2.  
878  
879
- 880 54. Schlick T, Li B, Olson WK. The influence of salt on the structure and energetics of supercoiled DNA. *Biophys J*. 1994  
881 Dec;67(6):2146-66. doi: 10.1016/S0006-3495(94)80732-5.  
882
- 883 55. Wang X, Rudner DZ. Spatial organization of bacterial chromosomes. *Curr Opin Microbiol*. 2014 Dec;22:66-72. doi:  
884 10.1016/j.mib.2014.09.016.  
885
- 886 56. Badrinarayanan A, Le TB, Laub MT. Bacterial chromosome organization and segregation. *Annu Rev Cell Dev Biol*.  
887 2015;31:171-99. doi: 10.1146/annurev-cellbio-100814-125211.  
888
- 889 57. Osorio-Valeriano M, Altegoer F, Steinchen W, Urban S, Liu Y, Bange G, et al. ParB-type DNA segregation proteins  
890 are CTP-dependent molecular switches. *Cell*. 2019 Dec 12;179(7):1512-1524.e15. doi: 10.1016/j.cell.2019.11.015.  
891  
892
- 893 58. Ehrle HM, Guidry JT, Iacovetto R, Salisbury AK, Sandidge DJ, Bowman GR. Polar organizing protein PopZ is  
894 required for chromosome segregation in *Agrobacterium tumefaciens*. *J Bacteriol*. 2017 Aug 8;199(17):e00111-17. doi:  
895 10.1128/JB.00111-17.  
896
- 897 59. Grangeon R, Zupan JR, Anderson-Furgeson J, Zambryski PC. PopZ identifies the new pole, and PodJ identifies the old  
898 pole during polar growth in *Agrobacterium tumefaciens*. *Proc Natl Acad Sci U S A*. 2015 Sep 15;112(37):11666-71.  
899 doi: 10.1073/pnas.1515544112.  
900
- 901 60. Robalino-Espinosa JS, Zupan JR, Chavez-Arroyo A, Zambryski P. Segregation of four *Agrobacterium tumefaciens*  
902 replicons during polar growth: PopZ and PodJ control segregation of essential replicons. *Proc Natl Acad Sci U S A*.  
903 2020 Oct 20;117(42):26366-26373. doi: 10.1073/pnas.2014371117.  
904
- 905 61. Fields AT, Navarrete CS, Zare AZ, Huang Z, Mostafavi M, Lewis JC, et al. The conserved polarity factor podJ1  
906 impacts multiple cell envelope-associated functions in *Sinorhizobium meliloti*. *Mol Microbiol*. 2012 Jun;84(5):892-920.  
907 doi: 10.1111/j.1365-2958.2012.08064.x.  
908
- 909 62. Lin L, Osorio Valeriano M, Harms A, Søgaard-Andersen L, Thanbichler M. Bactofilin-mediated organization of the  
910 ParABS chromosome segregation system in *Myxococcus xanthus*. *Nat Commun*. 2017 Nov 28;8(1):1817. doi:  
911 10.1038/s41467-017-02015-z.  
912
- 913 63. Ozaki S, Jenal U, Katayama T. Novel divisome-associated protein spatially coupling the Z-Ring with the chromosomal  
914 replication terminus in *Caulobacter crescentus*. *mBio*. 2020 Apr 28;11(2):e00487-20. doi: 10.1128/mBio.00487-20.  
915
- 916 64. Woldemeskel SA, McQuillen R, Hessel AM, Xiao J, Goley ED. A conserved coiled-coil protein pair focuses the  
917 cytokinetic Z-ring in *Caulobacter crescentus*. *Mol Microbiol*. 2017 Sep;105(5):721-740. doi: 10.1111/mmi.13731.  
918
- 919 65. Zimmerman SB, Trach SO. Estimation of macromolecule concentrations and excluded volume effects for the  
920 cytoplasm of *Escherichia coli*. *J Mol Biol*. 1991 Dec 5;222(3):599-620. doi: 10.1016/0022-2836(91)90499-v.  
921  
922
- 923 66. Zimmerman SB, Minton AP. Macromolecular crowding: biochemical, biophysical, and physiological consequences.  
924 *Annu Rev Biophys Biomol Struct*. 1993;22:27-65. doi: 10.1146/annurev.bb.22.060193.000331.  
925



- 926 67. Parry BR, Surovtsev IV, Cabeen MT, O'Hern CS, Dufresne ER, Jacobs-Wagner C. The bacterial cytoplasm has glass-  
927 like properties and is fluidized by metabolic activity. *Cell*. 2014 Jan 16;156(1-2):183-94. doi:  
928 10.1016/j.cell.2013.11.028.  
929
- 930 68. De Nisco NJ, Abo RP, Wu CM, Penterman J, Walker GC. Global analysis of cell cycle gene expression of the legume  
931 symbiont *Sinorhizobium meliloti*. *Proc Natl Acad Sci U S A*. 2014 Mar 4;111(9):3217-24. doi:  
932 10.1073/pnas.1400421111.  
933
- 934 69. diCenzo GC, Cangioli L, Nicoud Q, Cheng JHT, Blow MJ, Shapiro N, et al. DNA Methylation in *Ensifer* species  
935 during free-living growth and during nitrogen-fixing symbiosis with *Medicago* spp. *mSystems*. 2022 Feb  
936 22;7(1):e0109221. doi: 10.1128/mSystems.01092-21.  
937
- 938 70. Fioravanti A, Fumeaux C, Mohapatra SS, Bompard C, Brilli M, Frandi A, et al. DNA binding of the cell cycle  
939 transcriptional regulator GcrA depends on N6-adenosine methylation in *Caulobacter crescentus* and other  
940 Alphaproteobacteria. *PLoS Genet*. 2013 May;9(5):e1003541. doi: 10.1371/journal.pgen.1003541.
- 941 71. Haakonsen DL, Yuan AH, Laub MT. The bacterial cell cycle regulator GcrA is a  $\sigma 70$  cofactor that drives gene  
942 expression from a subset of methylated promoters. *Genes Dev*. 2015 Nov 1;29(21):2272-86. doi:  
943 10.1101/gad.270660.115.  
944
- 945 72. Wright R, Stephens C, Shapiro L. The CcrM DNA methyltransferase is widespread in the alpha subdivision of  
946 proteobacteria, and its essential functions are conserved in *Rhizobium meliloti* and *Caulobacter crescentus*. *J Bacteriol*.  
947 1997 Sep;179(18):5869-77. doi: 10.1128/jb.179.18.5869-5877.1997.  
948
- 949 73. Gueiros-Filho FJ, Losick R. A widely conserved bacterial cell division protein that promotes assembly of the tubulin-  
950 like protein FtsZ. *Genes Dev*. 2002 Oct 1;16(19):2544-56. doi: 10.1101/gad.1014102.  
951
- 952 74. Ozaki S, Wakasugi Y, Katayama T. Z-Ring-associated proteins regulate clustering of the replication terminus-binding  
953 protein ZapT in *Caulobacter crescentus*. *mBio*. 2021 Jan 26;12(1):e02196-20. doi: 10.1128/mBio.02196-20.  
954
- 955 75. Ulvé VM, Sevin EW, Chéron A, Barloy-Hubler F. Identification of chromosomal alpha-proteobacterial small RNAs by  
956 comparative genome analysis and detection in *Sinorhizobium meliloti* strain 1021. *BMC Genomics*. 2007 Dec 19;8:467.  
957 doi: 10.1186/1471-2164-8-467.  
958
- 959 76. Brilli M, Fondi M, Fani R, Mengoni A, Ferri L, Bazzicalupo M, et al. The diversity and evolution of cell cycle  
960 regulation in alpha-proteobacteria: a comparative genomic analysis. *BMC Syst Biol*. 2010 Apr 28;4:52. doi:  
961 10.1186/1752-0509-4-52.  
962
- 963 77. Biondi EG, Reisinger SJ, Skerker JM, Arif M, Perchuk BS, Ryan KR, et al. Regulation of the bacterial cell cycle by an  
964 integrated genetic circuit. *Nature*. 2006 Dec 14;444(7121):899-904. doi: 10.1038/nature05321.  
965
- 966 78. Chen YE, Tsokos CG, Biondi EG, Perchuk BS, Laub MT. Dynamics of two Phosphorelays controlling cell cycle  
967 progression in *Caulobacter crescentus*. *J Bacteriol*. 2009 Dec;191(24):7417-29. doi: 10.1128/JB.00992-09.  
968
- 969 79. Mann TH, Seth Childers W, Blair JA, Eckart MR, Shapiro L. A cell cycle kinase with tandem sensory PAS domains  
970 integrates cell fate cues. *Nat Commun*. 2016 Apr 27;7:11454. doi: 10.1038/ncomms11454.  
971
- 972 80. Mann TH, Shapiro L. Integration of cell cycle signals by multi-PAS domain kinases. *Proc Natl Acad Sci U S A*. 2018  
973 Jul 24;115(30):E7166-E7173. doi: 10.1073/pnas.1808543115.  
974
- 975 81. Narayanan S, Kumar L, Radhakrishnan SK. Sensory domain of the cell cycle kinase CckA regulates the differential  
976 DNA binding of the master regulator CtrA in *Caulobacter crescentus*. *Biochim Biophys Acta Gene Regul Mech*. 2018  
977 Oct;1861(10):952-961. doi: 10.1016/j.bbagr.2018.08.006.  
978
- 979 82. Bertani G. Studies on lysogeny. I. The mode of phage liberation by lysogenic *Escherichia coli*. *J Bacteriol*. 1951  
980 Sep;62(3):293-300. doi: 10.1128/jb.62.3.293-300.1951.  
981
- 982 83. Green MR, Hughes H, Sambrook J, MacCallum P. Molecular cloning: a laboratory manual, 4th ed., Cold Spring  
983 Harbor Laboratory Press, New York; Cold Spring Harbor; 4th ed; 2012. 1890 p  
984  
985  
986

- 987  
~~988~~  
990  
991  
992  
993  
994  
995  
996  
997  
998  
999  
1000  
1001  
1002  
1003  
1004  
1005  
1006  
1007  
1008  
~~1009~~  
1011  
1012  
1013  
1014  
1015  
~~1016~~  
1018  
1019  
1020  
1021  
1022  
1023  
~~1024~~  
1026  
1027  
1028  
1029
84. Beringer JE. R factor transfer in *Rhizobium leguminosarum*. *J Gen Microbiol*. 1974 Sep;84(1):188-98. doi: 10.1099/00221287-84-1-188.
85. Zhan HJ, Lee CC, Leigh JA. Induction of the second exopolysaccharide (EPSb) in *Rhizobium meliloti* SU47 by low phosphate concentrations. *J Bacteriol*. 1991 Nov;173(22):7391-4. doi: 10.1128/jb.173.22.7391-7394.1991.
86. Simon R, Priefer U, Pühler A. A broad host range mobilization system for *in vivo* genetic engineering: transposon mutagenesis in Gram negative bacteria. *Nat Biotechnol*. 1983 Nov;1(9):784-791. doi: 10.1038/nbt1183-784.
87. Ferri L, Gori A, Biondi EG, Mengoni A, Bazzicalupo M. Plasmid electroporation of *Sinorhizobium* strains: the role of the restriction gene *hsdR* in type strain Rm1021. *Plasmid*. 2010 May;63(3):128-35. doi: 10.1016/j.plasmid.2010.01.001.
88. Schäfer A, Tauch A, Jäger W, Kalinowski J, Thierbach G, Pühler A. Small mobilizable multi-purpose cloning vectors derived from the *Escherichia coli* plasmids pK18 and pK19: selection of defined deletions in the chromosome of *Corynebacterium glutamicum*. *Gene*. 1994 Jul 22;145(1):69-73. doi: 10.1016/0378-1119(94)90324-7.
89. Checcucci A, diCenzo GC, Ghini V, Bazzicalupo M, Becker A, Decorosi F, et al. Creation and characterization of a genomically hybrid strain in the nitrogen-fixing symbiotic bacterium *Sinorhizobium meliloti*. *ACS Synth Biol*. 2018 Oct 19;7(10):2365-2378. doi: 10.1021/acssynbio.8b00158.
90. Schäper S, Krol E, Skotnicka D, Kaefer V, Hilker R, Søgaard-Andersen L, et al. Cyclic Di-GMP regulates multiple cellular functions in the symbiotic Alphaproteobacterium *Sinorhizobium meliloti*. *J Bacteriol*. 2015 Nov 16;198(3):521-35. doi: 10.1128/JB.00795-15.
91. McGee-Russell SM, Allen RD. Reversible stabilization of labile microtubules in the reticulopodial network of *Allogromia*. *Adv Cell Mol Biol*. 1971;1:153-184.
92. Ducret A, Quardokus EM, Brun YV. MicrobeJ, a tool for high throughput bacterial cell detection and quantitative analysis. *Nat Microbiol*. 2016 Jun 20;1(7):16077. doi: 10.1038/nmicrobiol.2016.77.
93. Marchler-Bauer A, Lu S, Anderson JB, Chitsaz F, Derbyshire MK, DeWeese-Scott C, et al. CDD: a conserved domain database for the functional annotation of proteins. *Nucleic Acids Res*. 2011 Jan;39(Database issue):D225-9. doi: 10.1093/nar/gkq1189.
94. Marchler-Bauer A, Derbyshire MK, Gonzales NR, Lu S, Chitsaz F, Geer LY, et al. CDD: NCBI's conserved domain database. *Nucleic Acids Res*. 2015 Jan;43(Database issue):D222-6. doi: 10.1093/nar/gku1221.
95. Marchler-Bauer A, Bo Y, Han L, He J, Lanczycki CJ, Lu S, et al. CDD/SPARCLE: functional classification of proteins via subfamily domain architectures. *Nucleic Acids Res*. 2017 Jan 4;45(D1):D200-D203. doi: 10.1093/nar/gkw1129.

1030 ■ **FIGURE CAPTIONS**

1031 **Fig 1. Design and compositional properties of the genomic content in *S. meliloti* replicon fusion strains SmAB**  
1032 **and SmABC.**

1033 (A) Configurations of replicon fusions. The inner concentric ring represents the deviation (positive: grey colored,  
1034 negative: black colored) from the average GC-skew of the entire sequence calculated by a sliding window of (G-  
1035 C)/(G+C). Replication origin of pSymA, pSymB and the chromosome (red circles including A/B/C); predicted  
1036 terminus region of pSymA, pSymB and the chromosome (black diamonds including A/B/C); chromosome (Chr);  
1037 pSymAB (AB); fusion product of pSymAB and the chromosome (ABC). (B) Pulsed-field gel electrophoresis of PaeI  
1038 digested gDNA from *S. meliloti* strains SmCreΔhsdR (Wt), SmAB (AB) and SmABC (ABC). Expected banding  
1039 pattern for SmCreΔhsdR (wt): 3.65 Mbp (chromosome), 1.35 Mbp (pSymA), 1.15 Mbp (pSymB fragment 1), 0.53  
1040 Mbp (pSymB fragment 2). SmAB: 3.65 Mbp (chromosome), 1.67 Mbp, 0.83 Mbp, 0.53 Mbp. SmABC: 2.53 Mbp,  
1041 1.94 Mbp, 1.67 Mbp, 0.53 Mbp. M: PFGE marker yeast chromosomes, *Saccharomyces cerevisiae* (Strain YNN295).  
1042 (C) Cumulated CDS skew (CDS<sup>c</sup> skew) curve represents the coding sequence orientation bias in the SmABC fusion  
1043 strain. (D) KOPS distribution in SmABC. For the analysis and representation of the replicon structure the *E. coli*  
1044 KOPS consensus sequence (GGGNAGGG) was used. KOPS<sup>c</sup> visualizes the accumulation of the KOPS motifs either  
1045 located on the forward strand (black lines) or on the reverse strand (grey lines) of the sequence in SmABC. Color  
1046 code: chromosome (grey), pSymA (green), pSymB (blue).

1047 **Fig 2. Basic characterization of *S. meliloti* replicon fusion strains SmAB and SmABC.**

1048 (A) Phase contrast microscopy images of SmAB, SmABC and precursor strain SmCreΔhsdR (wt) representative cells  
1049 at different stages of the cell cycle. Scale bar: 2 μm. (B) Growth of *S. meliloti* SmAB and SmABC compared to  
1050 precursor strain SmCreΔhsdR (wt) in rich medium (TY), minimal medium (MOPS low P<sub>i</sub>), high salt medium (TY +  
1051 0.4 M NaCl) and high sucrose medium (TY + 0.5 M sucrose). Data represent the mean ± standard deviation of three  
1052 technical replicates. Growth curves of biological replicates are shown in S8A Fig.

1053 **Fig 3. Deletion and mutational studies in *S. meliloti* SmCreΔhsdR (wt), SmAB and SmABC fusion strains.**

1054 (A) Growth curves of *S. meliloti* SmAB and SmABC *repC* deletion strains. Prior to inoculation, overnight cultures  
1055 were washed with 0.9 % NaCl and adjusted to an OD<sub>600</sub> ~ 0.15 in TY medium. Mean and standard deviation was  
1056 calculated from three technical replicates. (B) Morphology of the double *repC* deletion mutant strain SmABCΔoriV.  
1057 (C) Marker frequency analysis of SmABC and SmABCΔoriV of logarithmic (OD<sub>600</sub> of 0.6) vs. stationary (OD<sub>600</sub> of  
1058 2.6) cultures. Trimmed and normalized marker frequencies are depicted in log<sub>2</sub> as a function of the genome position  
1059 in Mbp. Arrowheads indicate the position of origin and predicted terminus regions [32]. Note that SmABCΔoriV lacks  
1060 *oriA* and *oriB* due to *repC* deletions (Δ*oriA* and Δ*oriB*).

1061 **Fig 4. Investigation and modeling of the spatial DNA organization in SmABCΔR.**

1062 (A) Schematic true to scale representation of the SmABCΔR monopartite genome with *tetO* and *lacO* integration sites  
1063 1-18 selected to reveal the spatial configuration of the genomic DNA. Color code: chromosome (grey), pSymA  
1064 (green), pSymB (blue). Red circles: replication origins, black diamonds: terminus regions. (B) Example of snapshot

1065 images from labeled cells used for the 2D genome mapping study. Scale bar: 1  $\mu\text{m}$ . **(C)** Normalized spatial localization  
1066 of labeled loci within SmABC $\Delta$ R (filled circles) compared to SmCre $\Delta$ hsdR (non-filled circles) with wild type genome  
1067 configuration as a function of the genome sequence coordinate. Old cell pole: 1, New cell pole: -1. **(D)** Scatter plots  
1068 of selected strains illustrate examples of similar (Pos. no.: 2, 3, 18) and clearly different distribution (Pos. no.: 5, 10,  
1069 16) of marked loci within SmABC $\Delta$ R (red dots) and SmCre $\Delta$ hsdR (black dots). **(E)** Example configuration of  
1070 simulations consolidating physical principles such as self-avoidance and compaction of DNA in a SmABC $\Delta$ R cell  
1071 represented as spherocylindrical shape. **(F)** Model of DNA self-organization in SmABC $\Delta$ R compared to the  
1072 experimental data. The model considers a spatial confinement (experimental standard deviation) for *terA* and *terB* in  
1073 addition to *oriABC* and *terC* as fixpoints. Shown are the normalized locations in the cell as a function of the position  
1074 on the genomic map. Experimental data of origins are indicated by red circles, terminus regions by black diamonds  
1075 and remaining marker positions with non-filled circles. The red line depicts the model results averaged over 276 cells.  
1076 Shaded areas represent the standard deviations. For the model a cell of 1800 nm and a loop-size of 1298 bp (DNA  
1077 within a “blob”) was used.

1078 **Fig 5. Spatiotemporal pattern of origin and terminus regions in native and reorganized multi-replicon**  
1079 **backgrounds.**

1080 **(A)** Temporal order of origin and terminus region segregation in SmCre $\Delta$ hsdR (wt), SmAB $\Delta$ R (AB), SmABC $\Delta$ R  
1081 (ABC) and SmABC $\Delta$ oriV $\Delta$ R (ABC $\Delta$ ). Colored bars with a black center indicate the standard deviation and the mean  
1082 timepoint of sister foci separation within the cell cycle normalized to 100 %. Analyzed M-cells: 20 (*oriC*), 10 (*oriA/B*)  
1083 and 5 (*terA/B/C*). **(B)** Localization of *ori* and *ter* foci segregation in SmCre $\Delta$ hsdR (wt), SmAB $\Delta$ R, SmABC $\Delta$ R and  
1084 SmABC $\Delta$ oriV $\Delta$ R. The bar chart depicts the relative longitudinal position of a single focus before separation within  
1085 the normalized cell (old pole: 0, new pole: 1, midcell: 0,5). Data represent the mean  $\pm$  the standard deviation for *oriC*  
1086 ( $n=20$ ), *terC* ( $n=5$ ), *oriA* ( $n=10$ ), *terA* ( $n=5$ ), *oriB* ( $n=10$ ) and *terB* ( $n=5$ ) in M-cells. **(C)** Spatiotemporal choreography  
1087 of *oriC* and *terC* in SmCre $\Delta$ hsdR (wt), SmAB $\Delta$ R, SmABC $\Delta$ R and SmABC $\Delta$ oriV $\Delta$ R. (i) Time lapse series with *oriC*  
1088 (ParB-cerulean) and *terC* (TetR-mVenus) in SmCre $\Delta$ hsdR (wt) and SmABC $\Delta$ R. Scale bar: 1  $\mu\text{m}$ . (ii) Timepoint of  
1089 *oriC* (cyan circles) arriving at the new cell pole in relation to *terC* (yellow circles) release from the same pole within  
1090 a normalized cell cycle (0-100 %). Analyzed M-cells: 5 each. Black bar indicates the data mean. **(D)** Time lapse  
1091 microscopy series of SmCre $\Delta$ hsdR (wt) and SmABC $\Delta$ R as examples of sequential segregation of *oriA* and *oriB* with  
1092 varying order. Arrowheads depict the position of segregation start. **(E)** Percentage of cells with *oriA* foci (green) and  
1093 *oriB* foci (blue) segregating first. Cells analyzed: SmCre $\Delta$ hsdR (wt) ( $n=172$ ), SmAB $\Delta$ R ( $n=179$ ), SmABC $\Delta$ R  
1094 ( $n=169$ ), and SmABC $\Delta$ oriV $\Delta$ R ( $n=197$ ).  
1095 Color code: chromosome (grey), pSymA (green), pSymB (blue). Mother cell (M), daughter cell (D). Note that  
1096 SmABC $\Delta$ oriV $\Delta$ R lacks *oriA* and *oriB* due to *repC* deletions. For simplicity, localization of *repABAC* loci is denoted  
1097 as *oriA* and *oriB* in panels A, B, C and E.

1098 **Fig 6. Mislocalization of the replication origin regions in SmABC $\Delta$ oriV $\Delta$ R.**

1099 **(A)** Localization of *oriC* in SmCre $\Delta$ hsdR (wt), SmAB $\Delta$ R, SmABC $\Delta$ R and SmABC $\Delta$ oriV $\Delta$ R G<sub>1</sub>-phase cells. Bar chart  
1100 depict the percentage of cells with *oriC* (ParB-cerulean) foci at the cell poles (white cell compartment, 0.5 to 1 and -

1101 0.5 to -1) and at midcell (grey cell compartment, 0.5 to -0.5). Cells analyzed: SmCreΔhsdR (wt) (n=480), SmABΔR  
1102 (n=581), SmABCΔR (n=371), SmABCΔoriVΔR (n=936). **(B)** Co-localization of *oriA/B/C* in SmCreΔhsdR (wt),  
1103 SmABΔR, SmABCΔR and SmABCΔoriVΔR G<sub>1</sub>-phase cells. Shown are the percentage of cells with localization of  
1104 either *oriA/C* (white bar), *oriB/C* (grey bar) and *oriA/B/C* (black bar) in the midcell area (0.5 to -0.5). Cells analyzed:  
1105 SmCreΔhsdR (wt) (n=639), SmABΔR (n=460), SmABCΔR (n=405), SmABCΔoriVΔR (n=246). Dots in the  
1106 schematic cells represent *oriC* (grey), *oriA* (green) and *oriB* (blue). Note that SmABCΔoriVΔR lacks *oriA* and *oriB*  
1107 due to *repC* deletions. For simplicity, localization of *repABC* loci is denoted as *oriA* and *oriB*. **(C)** Analysis of *oriC*  
1108 localization in predivisional cells of SmABCΔoriVΔR. The density map indicates the position of the chromosomal  
1109 origin in sibling 1 (left cell) and sibling 2 (right cell) of predivisional cells (n=400) in a normalized scale. Snapshot  
1110 images and percentage of the two major *oriC* spatial position patterns in predivisional cells. Scale bar: 2 μm. **(D)** Time  
1111 lapse microscopy series of generic *oriC* choreography in sibling cells of SmABCΔoriVΔR. Arrowheads depict the  
1112 position of visible *oriC* foci segregation. Scale bar: 1 μm. **(E)** Model of *oriC* choreography in SmABCΔoriVΔR. The  
1113 model differentiates between *oriC* coordination in daughter (D, light grey) and mother (M, anthracite) cells. Cyan  
1114 cycles with numbers (1: *oriC1*, 2: *oriC2*) represent the deduced *oriC* positioning within the cells.

1115 **Fig 7. Localization of the chromosomal origin in fusion strains with wild type CckA and CckA<sup>R436H</sup>.**

1116 **(A)** Localization of *oriC* (ParB-cerulean) in SmCreΔhsdR (wt) and SmABCΔR G<sub>1</sub>-phase cells with *cckA<sub>R436H</sub>* (black  
1117 bars) compared to respective strains with wild type *cckA* (grey shaded bars). Cells analyzed: SmCreΔhsdR n= 480  
1118 (*cckA<sub>wt</sub>*), n=407 (*cckA<sub>R436H</sub>*), SmABCΔR n= 371 (*cckA<sub>wt</sub>*), n=352 (*cckA<sub>R436H</sub>*). Snapshot images as example for polar  
1119 and midcell localization of *oriC*. Scale bar: 1 μm. **(B)** Comparison of polar and midcell localization of *oriC* in  
1120 SmABCΔoriV (precursor of SmABCΔoriVΔR) and SmABC, both with wild type *cckA*. White bars depict the  
1121 percentage of cells with polar *oriC* localization whereas grey bars represent midcell localization. Cells analyzed:  
1122 SmABCΔoriV (n= 472), SmABC (n=584).

1123 ■ FIGURES

1124 Fig1

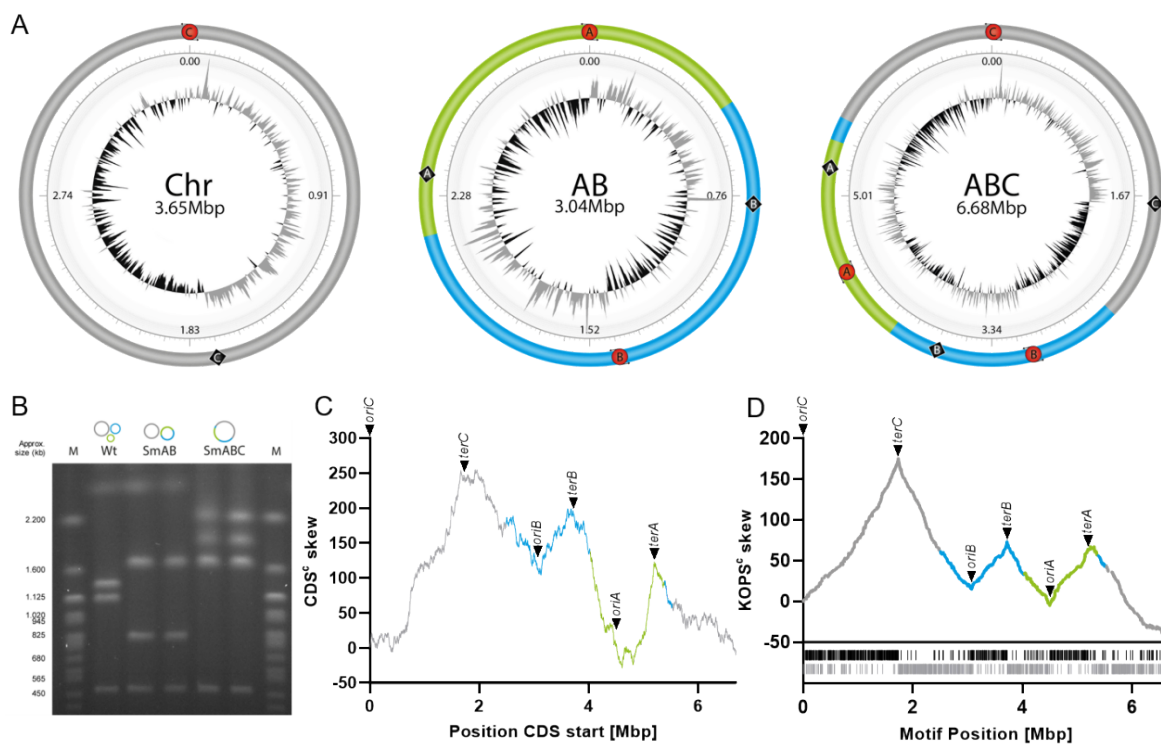

1125

1126 Fig2

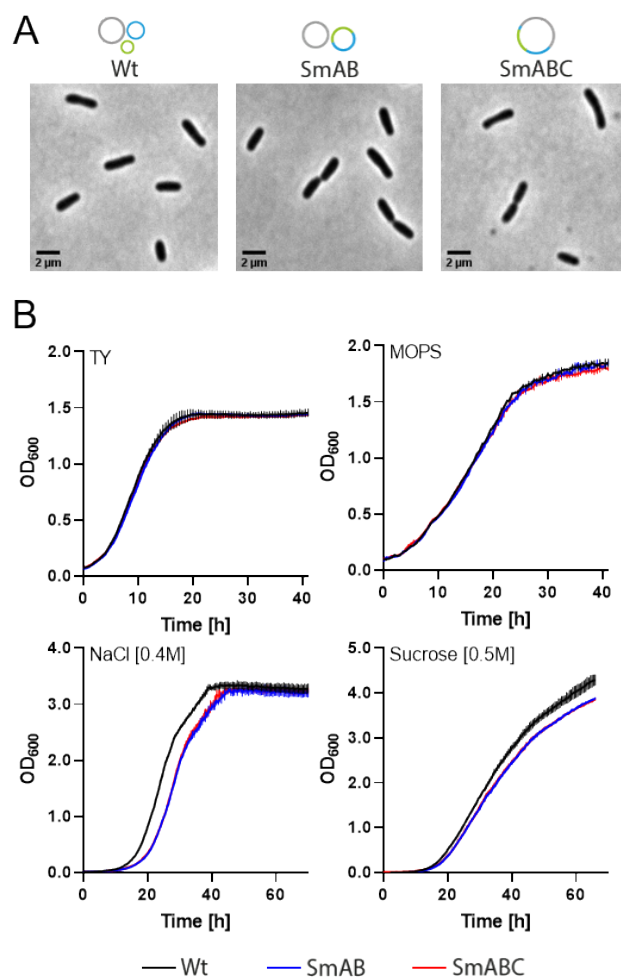

1127

1128 Fig3

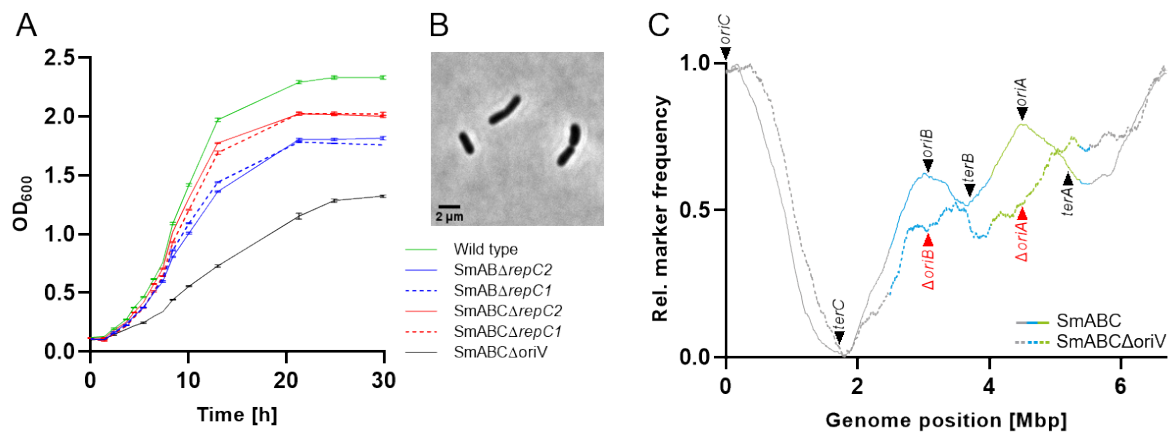

1129



1130 **Fig4**

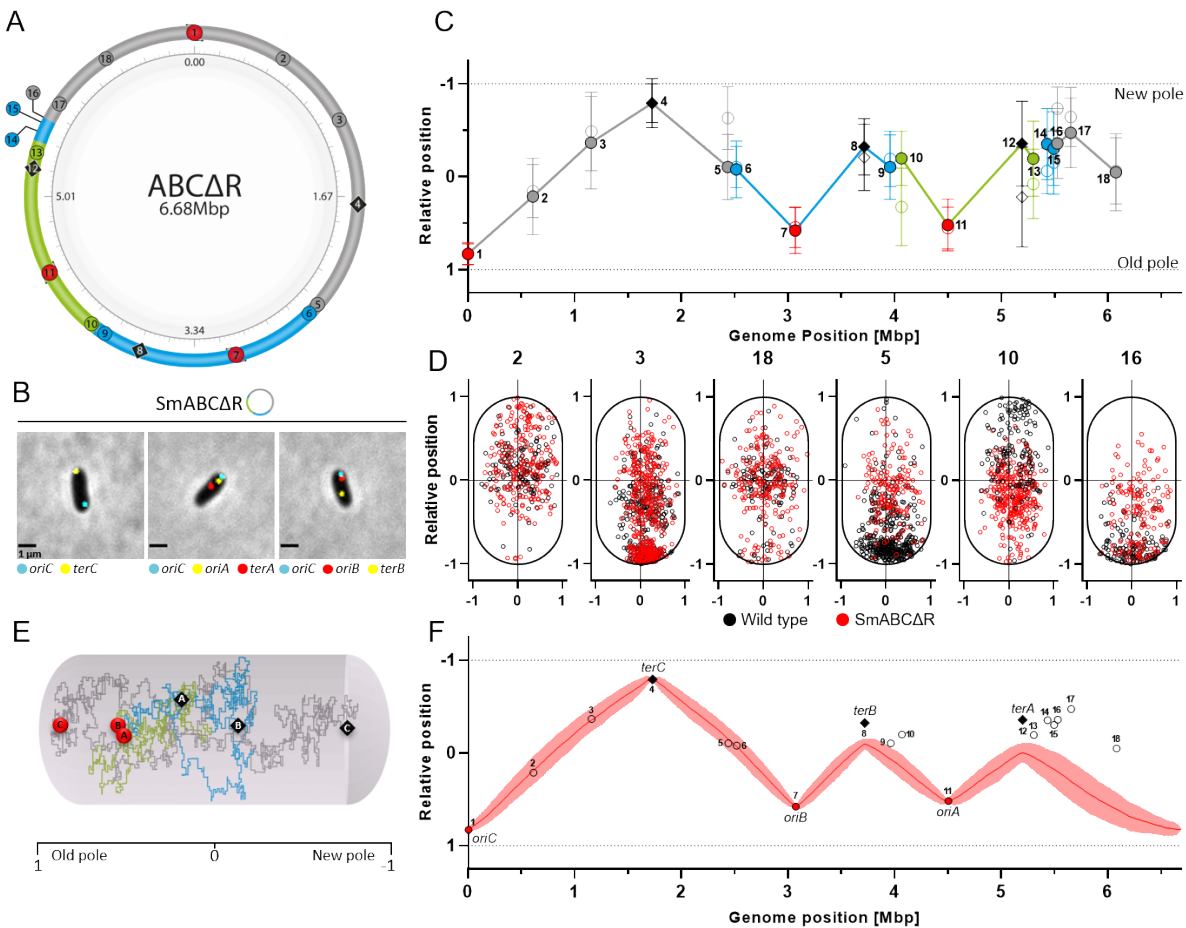

1131

1132 **Fig5**

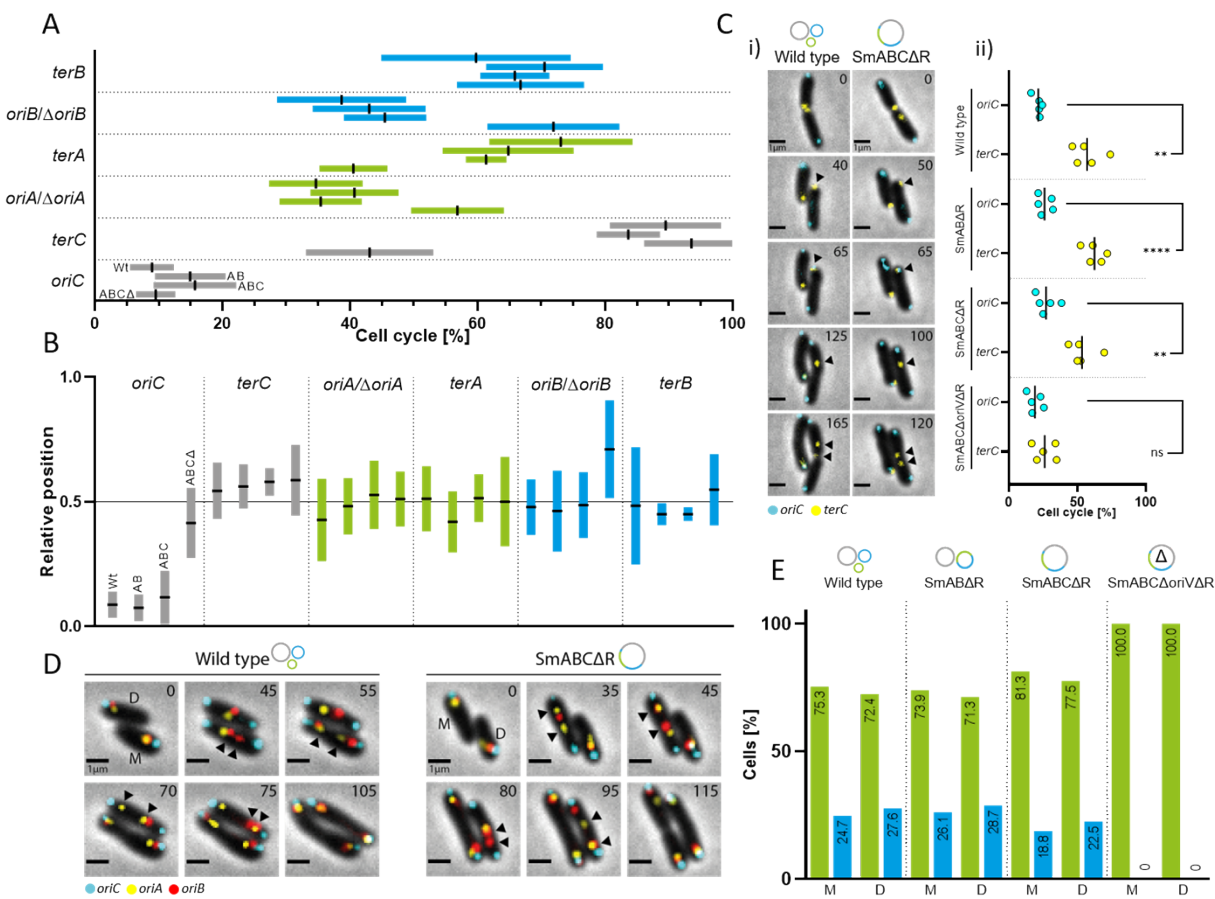

1133

1134

1135 **Fig6**

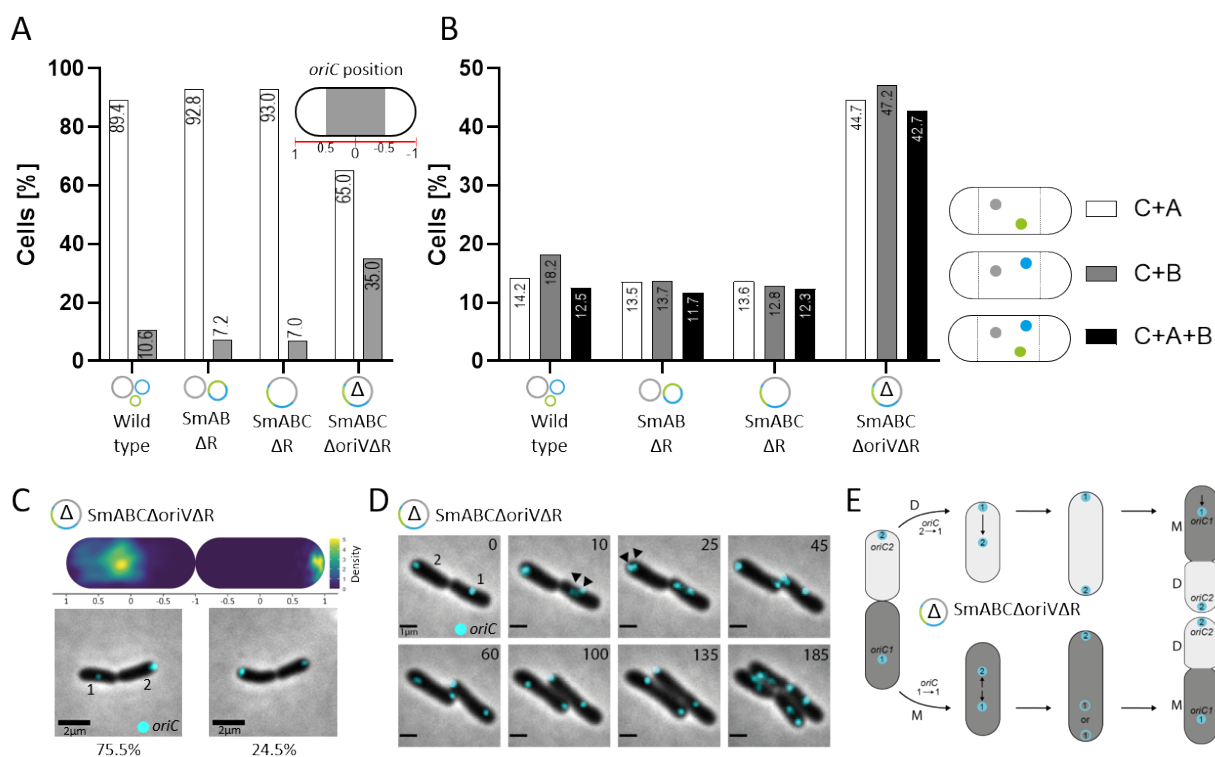

1136

1137

1138 Fig7

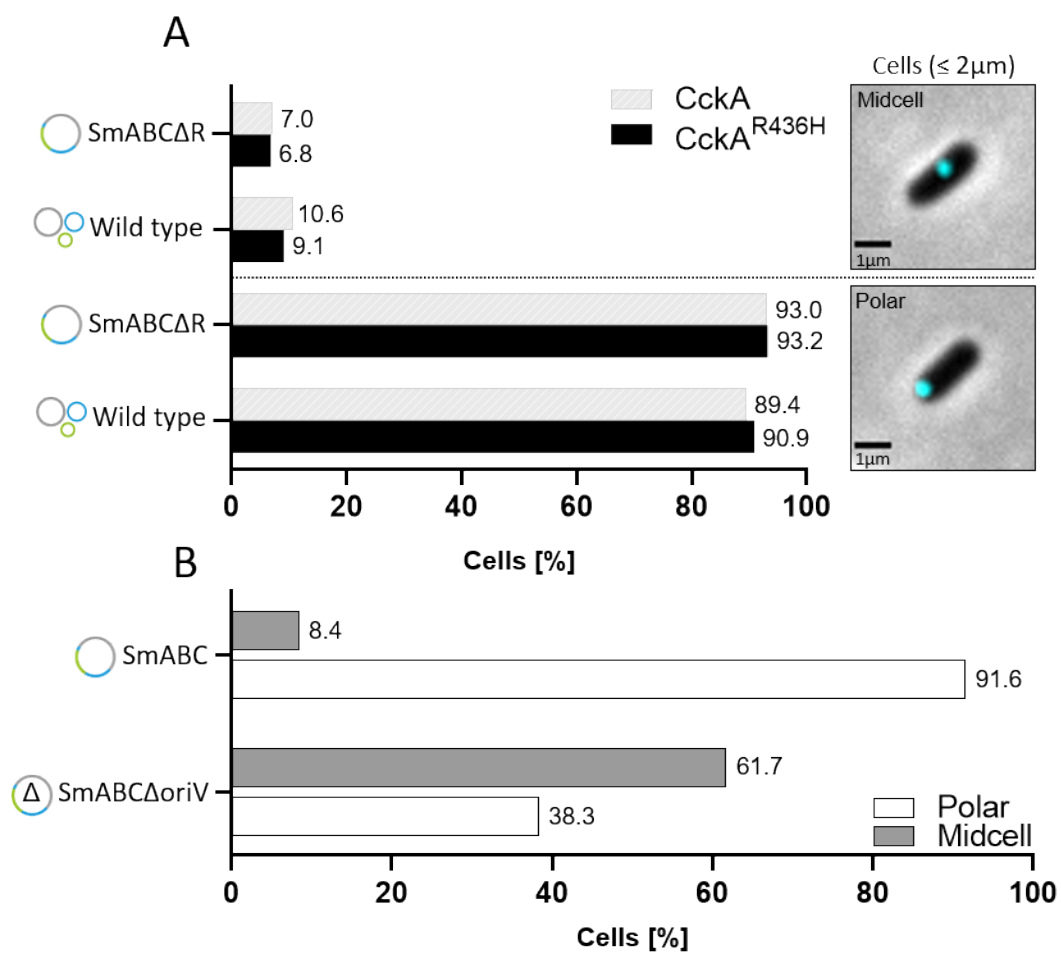

1139

## 1140 ■ SUPPORTING INFORMATION

1141 **S1 Fig. Construction of *S. meliloti* SmAB and SmABC.** (A) Initially, *S. meliloti* SmCreΔhsdR (wild type) was transformed with  
1142 integrative pK18mobsacB derivatives pJD98 and pJD99, thereby providing *loxL* and *loxR* sites (black triangles, non-filled indicates  
1143 mutation) at 125°(pSymA) and 169°(pSymB) for Cre-mediated megaplasmid fusion and components of a spectinomycin resistance  
1144 cassette allowing for positive selection after Cre/*lox* recombination. Plasmid backbone of pJD99 was deleted via *sacB* mediated  
1145 sucrose selection. In contrast, the backbone of pJD98 was retained for enabling sucrose selection in a later step. Due to Cre-  
1146 mediated replicon fusion, the homologous *nodPQ1*(SMa0855/SMa0857) and *nodPQ2* (SMb21223/SMb21224) operon came into  
1147 close proximity, flanking the pJD98 derived plasmid backbone, thereby enabling sucrose selection-mediated deletion of the vector  
1148 backbone and a wild type *loxP* site (resulting from *loxL/R* mediated Cre recombination). Thus, the resulting strain SmAB could be  
1149 easily used for further Cre/*lox* reactions. *P<sub>aacC1</sub>*: Constitutive resistance cassette promoter. (B) *S. meliloti* strain SmAB was then  
1150 transformed with pK18mobsacB derivative pJD130 which provides the hybrid replicon pSymAB with a *loxL* site at 238° followed  
1151 by the constitutive promoter *P<sub>min2</sub>*. Sucrose selection-mediated deletion of the plasmid backbone resulted in strain JDSm111 which  
1152 was then transformed with pJD126. In this way the chromosome was equipped with a *loxR* site at 246° and the promoterless  
1153 gentamicin resistance gene *aacC1*, thereby allowing for selection on gentamicin resistance after Cre/*lox* recombination. Thus, the  
1154 resulting strain SmABC exhibited an entirely merged genome and antibiotic resistances against tetracycline, spectinomycin and  
1155 gentamicin. *lox* sites were integrated close to the *algI* homologs of pSymB (SMb20843) and the chromosome (SMc01551), thereby  
1156 enabling sucrose selection-mediated deletion of a remaining *loxP* site and the plasmid backbone. A/B/C: DNA replication origin/  
1157 terminus region of pSymA/pSymB/chromosome. Mbp: Megabase pairs. R: antibiotic resistance gene.

1158 **S2 Fig. Transition zone validation in SmAB, SmABC and precursor strains.** (A) Successful merging of pSymA and pSymB  
1159 was initially verified using PCR. Amplification of a DNA segment covering the *loxP* fusion site 1 (FS1) with primer 239/131 (blue  
1160 arrows, fragment size: 0.76 kb) was only possible for strain JDSm98 (2) after Cre/*lox*-mediated fusion and sucrose selection. In  
1161 turn and as expected, this primer combination did not lead to an amplicon in the pre-fusion strain JDSm97 (1) and not in the final  
1162 secondary replicon fusion strains SmAB R1 (4) and SmAB R2 (3) after locking the genomic design by sucrose selection-mediated  
1163 removal of the pJD98 vector backbone including the wild type *loxP* and primer binding site. Using primer 236/249 (red arrows,  
1164 fragment size: 1.68 kb) targeting fusion site 2 (FS2) including the mutated *loxLR* site, PCR amplification was achieved for strains  
1165 JDSm98 (2), SmAB R1 (4) and SmAB R2 (3) but not for JDSm97 (1). (B) Proper fusion between the chromosome and pSymAB  
1166 was validated using PCR amplification of the fusion site 3 (FS3) for strain JDSm121 (6), SmABC R1 (8) and SmABC R2 (7) with  
1167 primer 360/247 (green arrows, fragment size: 1.18kb), but not for the pre-fusion strain JDSm118 (5). Fusion at site 4 (FS4) was  
1168 confirmed with primer 363/131 (orange arrows, fragment size: 0.80 kb) for strain JDSm121 (6). As expected, no amplification with  
1169 this primer combination could be achieved for the pre-fusion strain JDSm118 (5) and the final SmABC strains (7/8) with removed  
1170 pJD126 backbone including the wild type *loxP* and primer binding site.

1171 **S3 Fig. Replichore ratio in *S. meliloti* fusion strains.** (A) Predicted replicon structure and replichore distribution in SmCreΔhsdR  
1172 (wt), SmAB and SmABC. Dashed arrows with circular basis depict the predicted bidirectional replication movement of the  
1173 individual replichores emerging from *oriC*, *oriA* and *oriB*. (B) Percentage ratio between the left (black) and right (grey) replichores  
1174 of the chromosome (Chr) and secondary replicons in *S. meliloti* wild type, SmAB and SmABC. Red circles with A/B/C: replication  
1175 origin of pSymA/pSymB/chromosome, Black diamonds with A/B/C: predicted terminus of pSymA/pSymB/ chromosome.

1176 **S4 Fig. Visualization of the asymmetric nucleotide composition in SmCreΔhsdR (wt), SmAB and SmABC.** The abundance  
1177 of nucleotides is represented by the GC skew value of each replicon sequence. Analyzed sequences were subdivided into 1000  
1178 parts (windows) and the GC skew was calculated for each window as  $(G - C) / (G + C)$ . The GC skew graph depicts the value of  
1179 individual windows at certain positions moving with a defined step size along the analyzed sequence. The cumulative GC skew  
1180 (GC<sup>C</sup> skew) was calculated by addition of all GC-values from adjacent windows up to a specific position thereby most likely  
1181 representing the replichore bias with minimum values at origin and maximum values at terminus regions. The underlying nucleotide  
1182 skew data were generated using GenSkew (<http://genskew.csb.univie.ac.at>). Analysis parameter: SmCreΔhsdR (Chromosome):  
1183 GC-content: 62.7 %, window and step size: 3650 bp, max. GC<sup>C</sup> value: 6.44 (Pos: 1.73 Mbp), min. GC<sup>C</sup> value: -3.94 (3.65 Mbp).  
1184 SmCreΔhsdR (pSymA): GC-content: 60.4 %, window and step size: 1354 bp, max. GC<sup>C</sup> value: 3.16 (Pos: 0.55 Mbp), min. GC<sup>C</sup>  
1185 value: -3.29 (1.35 Mbp). SmCreΔhsdR (pSymB): GC-content: 62.4 %, window and step size: 1686 bp, max. GC<sup>C</sup> value: 6.65 (Pos:  
1186 1.10 Mbp), min. GC<sup>C</sup> value: -0.64 (0.05 Mbp). SmAB (pSymAB): GC-content: 61.5 %, window and step size: 3038 bp, max. GC<sup>C</sup>  
1187 value: 3.02 (Pos: 2.23 Mbp), min. GC<sup>C</sup> value: -0.06 (1.43 Mbp). SmABC (Chr. + pSymAB): GC-content: 62.2 %, window and step  
1188 size: 6683 bp, max. GC<sup>C</sup> value: 3.52 (Pos: 1.74 Mbp), min. GC<sup>C</sup> value: -2.23 (6.68 Mbp). Positions of terminus regions are based  
1189 on architecture imparting motif sequence (AIMS) predictions (Hendrickson & Lawrence, 2006). Color code: Chromosome (grey),  
1190 pSymA (green), pSymB (blue).

1191 **S5 Fig. Gene orientation bias in SmCreΔhsdR (wt), SmAB and SmABC.** The number of coding sequences (CDS) located on  
1192 the individual replicons revealed a gene strand bias between the leading (solid line) and the lagging (dashed line) strand of a  
1193 replichore with genes predominantly accumulating on the leading strand. SmCreΔhsdR (wt) Chr: 1871 CDS (56 %) on the leading  
1194 and 1488 CDS (44 %) on the lagging strand, pSymA: 787 CDS (61 %) on the leading and 503 CDS (39 %) on the lagging strand,  
1195 pSymB: 918 CDS (58 %) on the leading and 669 CDS (42 %) on the lagging strand. SmAB (pSymAB): 1691 CDS (59 %) on the  
1196 leading and 1183 CDS (41 %) on the lagging strands. SmABC (ABC): 3562 CDS (57 %) on the leading and 2666 CDS (43 %) on

1197 the lagging strands. Terminus regions depicted as predicted by Hendrickson & Lawrence, 2006. Color code: Chromosome (grey),  
1198 pSymA (green), pSymB (blue). *oriA/B/C*: origin of replication, *terA/B/C*: terminus region.

1199 **S6 Fig. Oligonucleotide bias of FtsK orienting polar sequences (KOPS).** Count of the *E. coli* KOPS consensus motif  
1200 GGGNAGGG (Bigot et al., 2005) on the forward (filled circles) and complementary strand (non-filled circles) respectively is  
1201 depicted as a function of the position on the genome sequence. The KOPS sequence as an architecture imparting motif was used to  
1202 display the strand asymmetry bias on the individual replichores. KOPS distribution was analysed by use of fuzznuc  
1203 ([http://emboss.toulouse.inra.fr/cgi-bin/emboss/fuzznuc?\\_pref\\_hide\\_optional=1](http://emboss.toulouse.inra.fr/cgi-bin/emboss/fuzznuc?_pref_hide_optional=1)). Terminus regions depicted as predicted by  
1204 Hendrickson & Lawrence, 2006. Color code: Chromosome (grey), pSymA (green), pSymB (blue). *oriA/B/C*: origin of replication,  
1205 *terA/B/C*: terminus region. Mbp: megabase pairs.

1206 **S7 Fig. Cell shape of SmCreΔhsdR (wt), SmAB, SmABC in TY and TY with 0.4M NaCl.** (A) Microscopic snapshot analysis  
1207 revealed a small subpopulation of cells with misplaced division septum (orange arrowhead) probably resulting in coccus-shaped  
1208 cell types here termed as minicells (red arrowhead). Scale bar: 2 μm. (B) Scatter plot with cell length [μm] as a function of cell  
1209 area [μm<sup>2</sup>] demonstrate the size distribution of SmCreΔhsdR (wt), SmAB and SmABC strains in an exponential growth phase  
1210 culture. The proportion of minicells defined with cell length <1 μm and area <0.6 μm<sup>2</sup> is indicated by the red square. C: Percentage  
1211 of minicells in TY with wt: 0.15 % (n=1958), SmAB: 0.16 % (n=2501), SmABC 0,15 % (n=1989) and TY [0.4 M NaCl] with wt:  
1212 0.04 % (n=2739), SmAB: 0.3 % (n=1687), SmABC: 0.08 % (n=2395).

1213 **S8 Fig. Growth of SmCreΔhsdR (wt), SmAB and SmABC.** (A) Growth of SmAB and SmABC replicate 2 compared to the  
1214 precursor strain SmCreΔhsdR (wt) with wild type genome configuration as a control in rich medium (TY), low phosphate minimal  
1215 medium (MOPS) and TY supplemented with either 0.4 M NaCl or 0.5 M sucrose. (B) Hypersaline (0.6 M NaCl) and high sugar  
1216 (0.7 M sucrose) condition revealed an increasing negative effect on growth behavior for strains SmAB and SmABC. However,  
1217 even SmCreΔhsdR with wild type-like genome configuration exhibit a diminished growth capacity under this stress conditions.  
1218 For the analysis, cell cultures were grown for 40 h and 70 h, respectively at 30 °C under shaking conditions (200 rpm). Optical  
1219 density was measured every 30 minutes at 600 nm (OD<sub>600</sub>). Prior to inoculation, overnight cultures were washed with 0.9 % NaCl  
1220 and adjusted to an OD<sub>600</sub> ~ 0.01 (TY+ 0.4 M NaCl, TY+ 0.5 M and 0.7 M sucrose) or 0.1 (TY, MOPS and TY+ 0.6 M NaCl) in  
1221 respective media supplemented with 600 μg/ml streptomycin. Error bars indicate standard deviation calculated from three technical  
1222 replicates.

1223 **S9 Fig. Deletion of *oriC*.** Previously, putative DnaA boxes 2-4 were identified to be essential for functionality of a minimal  
1224 chromosome origin (Sibley et al., 2006). Moreover, the transcription start site of *hemE* has been determined (Schlüter et al., 2013)  
1225 allowing for prediction of respective promoter motifs. In order to test whether the *oriC* region can be deleted when the genome is  
1226 entirely merged, *S. meliloti* SmABC was transformed with deletion constructs pJD226-228 and *sacB* mediated sucrose selection  
1227 was performed. However, clones lacking regions Δ1 (genome position smc3654130-smc283), Δ2 (smc3654130-smc478) or Δ3  
1228 (smc292-smc478) could not be identified.

1229 **S10 Fig. Characterization of *S. meliloti* replicon fusion strains lacking *repC* and *repBC* intergenic region.** (A) *repC* deletion  
1230 constructs pJD202 (Δ*repC1*) and pJD201 (Δ*repC2*) enabled deletion of the megaplasmid *oriV*s in *S. meliloti* strains SmAB and  
1231 SmABC but not in the wild type. (B) Proper deletion in the corresponding strains SmABΔ*repC1/2*, SmABCΔ*repC1/2* and  
1232 SmABCΔ*oriV* (lacking both *repC1* and *repC2*) was verified via PCR amplification of the deletion site using primers i) 852+853  
1233 (wt: 3.15 kb, Δ*repC1*: 1.67 kb) and ii) 850+851 (wt: 2.85 kb, Δ*repC2*: 1.39 kb). Additionally, *repC1/2* deletion in SmABCΔ*oriV*  
1234 was confirmed using paired-end MiSeq Illumina® sequencing. C: Pulsed-field gel electrophoresis (0.5 x TBE, 0.7 % agarose,  
1235 separation 72 h) banding pattern of *PacI*-digested gDNA from *S. meliloti* SmAB derivatives (fragments sizes in Mbp: 3.65, 1.67,  
1236 0.83, 0.53) and SmABC derivatives (fragment sizes in Mbp: 2.53, 1.94, 1.67, 0.53) verifies the expected genome configuration. M:  
1237 PFGE marker *S. cerevisiae*, Biorad.

1238 **S11 Fig. Marker frequency analysis to assess origin activities and location of replication terminus region in the wild type**  
1239 **strain SmCreΔhsdR (A), SmABC (B) and SmABCΔ*oriV* (C).** Shown are the averaged copy number profiles based on Illumina  
1240 sequencing as the log<sub>2</sub> ratio of each nucleotide in sequences calculated using a sliding window of 200 bp. Black arrowheads depict  
1241 the position of individual origin regions (Sibley et al., 2006, Cervantes-Rivera et al., 2011) and terminus regions as predicted by  
1242 Hendrickson and Lawrence, 2006. Red arrowheads in the profile of SmABCΔ*oriV* represent the deleted *oriA* (Δ*oriA*) and *oriB*  
1243 (Δ*oriB*) region. Colored (grey, blue, green) arrowheads indicate the local minima of the marker frequency analysis (MFA<sub>min</sub>) in  
1244 each strain. Non-filled arrowheads represent the position of the wild type MFA<sub>min</sub> in profiles of SmABC and SmABCΔ*oriV*.

1245 **S12 Fig. Replisome formation and dynamics in SmABCΔ*R* vs SmABCΔ*oriV*Δ*R*.** For visualization and comparison of the  
1246 intracellular replisome dynamics native *dnaN* in MWSm230 (SmABCΔ*R* with *parB::cerulean*) and MWSm285 (SmABCΔ*oriV*Δ*R*  
1247 with *parB::cerulean*) was replaced by a *dnaN-mCherry* translational fusion using pK19ms DnaN-mCherry. The resulting strains  
1248 SmABCΔ*R*-DnaN-mCh and SmABCΔ*oriV*Δ*R*-DnaN-mCh were analyzed in a 2 min interval time lapse series. The occurrence of  
1249 1-4 mCherry fluorescent foci in SmABCΔ*R* and 1-2 foci in SmABCΔ*oriV*Δ*R* (indicated by white arrowheads) in selected time  
1250 spots demonstrate a reduced replisome formation for SmABCΔ*oriV*Δ*R* suggesting loss of the replication initiation capacity of the

1251 secondary replicon's *repABC* modules deleted for *repC* and its intrinsic *oriV*. ParB-Cerulean foci visualize the location of the  
1252 *oriC*(s) over the period of time.

1253 **S13 Fig. Generation of antibiotic resistance marker-free *S. meliloti* fusion strains.** (A) Deletion of spectinomycin resistance  
1254 cassette ( $P_{\min 2}$ -*aadA1*) and gentamicin resistance cassette ( $P_{\min 2}$ -*aacCI*) together with the remaining *loxLR* sites from SmAB,  
1255 SmABC and SmABC $\Delta$ oriV leads to fusion strain variants SmAB $\Delta$ R, SmABC $\Delta$ R and SmABC $\Delta$ oriV $\Delta$ R. i) Proper removal of  
1256 SpecR in respective strains was realized using construct pJD222 and verified by PCR with primer 792/793 (precursor strains: 2.32  
1257 kb,  $\Delta$ SpecR: 1.16 kb). ii) Construct pJD229 mediated deletion of GmR was confirmed using primer 794/795 (precursor strains:  
1258 1.89 kb,  $\Delta$ GmR: 1.24 kb). (B) Genome configuration in SmAB $\Delta$ R, SmABC $\Delta$ R and SmABC $\Delta$ oriV $\Delta$ R was validated using pulsed-  
1259 field gel electrophoresis (0.5 x TBE, 0.7 % agarose, separation 72 h). Banding pattern of PacI-digested gDNA from SmAB $\Delta$ R  
1260 (fragments sizes in Mbp: 3.65, 1.67, 0.83, 0.53), SmABC $\Delta$ R derivative (fragment sizes in Mbp: 2.53, 1.94, 1.67, 0.53) and  
1261 SmABC $\Delta$ oriV $\Delta$ R derivative (fragment sizes in Mbp: 2.53, 1.94, 1.67, 0.53) compared to the direct precursor strains SmAB and  
1262 SmABC. M: PFGE marker *S. cerevisiae*, Biorad.

1263 **S14 Fig. Establishment of a genome architecture independent labeling strategy.** (A) Components of the triple color system. A  
1264 marker free in-frame fusion of *mcerulean* with *parB* (realized by integration of pMW198 via double homologous recombination)  
1265 enables a constitutively expressed labeling of the chromosomal origin (*oriC*) in all relevant *S. meliloti* genome variants. The second  
1266 part of the system (FROS) consists of a plasmid-based expression of *lacI-mCherry* and *tetR-mVenus* and enables the labeling of  
1267 individual positions by genomic integration of related *tetO*<sub>120</sub> and *lacO*<sub>120</sub> arrays. Equipped with a mobilization site, the pFROS  
1268 plasmid can be either transferred via conjugation or electroporation in all *S. meliloti* genome variants. (B) Validation of suitable  
1269 ParB-Cerulean function in SmCre $\Delta$ hsdR (wt), SmAB $\Delta$ R, SmABC $\Delta$ R and SmABC $\Delta$ oriV $\Delta$ R. Snapshot images revealed a  
1270 formation of either one or two fluorescence foci predominant at the pole envelope indicating the system to constitute as proper *oriC*  
1271 label. Growth curves of strains with *parB-cerulean* fusion show no negative effect on growth behavior when compared to direct  
1272 precursor strains. (C) Putative *parS* A2+3 boxes for ParB binding on the *S. meliloti* chromosome. An incomplete A2+3 box is  
1273 located 603 nt upstream of *parA* (*parS1*, gtttcacgtgaac, position smc3647435), and a further complete palindrome (which is also  
1274 covered by *parS1*) is situated 2606 nt upstream of *parA* (*parS2*, cgtttcacgtgaaacg, genome position smc3649438). Interestingly, a  
1275 degenerated variant (*parS3*, gwttcacgtgaawc; w= a or t) exclusively occurs on the chromosome and covers a 90 kb region including  
1276 *parAB-oriC* (at genome positions smc1945, -54110, -3618431, -3634210, -3647435, -3649439, -3651011, -3652552). (D)  
1277 Fluorescence microscopy analysis of SmCre $\Delta$ hsdR (wt) and SmABC $\Delta$ R revealed a sufficient fluorescent signal intensity after 2h,  
1278 4h and 6h. This demonstrates that expression of the FROS reporter genes from pFROS can be achieved without any inducer (basal  
1279 promoter activity coupled to plasmid copy number) over a long period of time which makes the system in particular attractive for  
1280 long term analysis, like time lapse applications.

1281 **S15 Fig. Genome structure validation in SmCre $\Delta$ hsdR (wt) and SmABC $\Delta$ R before analysis of spatial DNA organization.**  
1282 Pulsed field electrophoresis banding pattern of PacI-digested gDNA from (A) SmCre $\Delta$ hsdR (wt) and (B) SmABC $\Delta$ R with  
1283 *parB::cerulean* and integration of either a *tetO*<sub>120</sub> array at loci 18, 17, 16, 5 or a *lacO*<sub>120</sub> array at loci 2, 3, 10, 13, 6, 15, 14, 9.  
1284 Fragment sizes of SmCre $\Delta$ hsdR (wt) derivatives (3.65, 1.35, 1.15, 0.53 Mbp) and SmABC $\Delta$ R derivatives (2.53, 1.94, 1.67, 0.53  
1285 Mbp). Strains SmCre $\Delta$ hsdR (wt) and SmABC $\Delta$ R serving as control (C).

1286 **S16 Fig. Genome organization in SmABC $\Delta$ R compared to the wild type.** (A) Marker integration sites in genomic DNA of  
1287 SmABC $\Delta$ R and SmCre $\Delta$ hsdR (wt) (for detailed information on the position of genomic integrations please refer to S1 Table) (B)  
1288 Comparison of the fluorescent foci distribution in early G<sub>1</sub>-phase cells (cell length max: 2.0  $\mu$ m, single ParB-Cerulean focus) of in  
1289 SmCre $\Delta$ hsdR (wt) and SmABC $\Delta$ R. Old pole: 1, new pole: -1. Color code: chromosome (grey), pSymA (green), pSymB (blue).  
1290 Origins are represented as red circles and terminus regions as black diamonds.

1291 **S17 Fig. Modeling of spatial DNA arrangement in SmABC $\Delta$ R.** Model prediction for the organization the ABC fusion in SmABC  
1292 with (A) *oriC* (B) *oriC* and *terC* (C) *oriABC* (D) *oriABC* and *terC* as fixpoints at the mean experimental position. Shown are the  
1293 normalized positions in the cell (old pole: 1; new pole: -1) as a function of the position on the genomic map [Mbp]. Experimental  
1294 data of origins are indicated by red circles, terminus regions by black diamonds and remaining marker positions with non-filled  
1295 circles. The red line depicts the model results averaged over 200 cells. Shaded areas represent the standard deviations. For each  
1296 simulation, a cell size of 1800 nm and a loop size of 1298 bp (DNA within a "blob") was assumed. E: Bar chart of the dispersion  
1297 of the experimental marker data for SmABC $\Delta$ R. The statistical dispersion is measured via the mean absolute deviation (MAD).  
1298 The horizontal dashed line indicates the average dispersion (0.35) over all marker.

1299 **S18 Fig. Verification of the genome configuration in *S. meliloti* strains with origin and terminus marker.** Pulsed-field gel  
1300 electrophoresis banding pattern of PacI digested gDNA from SmCre $\Delta$ hsdR (wt), SmAB $\Delta$ R, SmABC $\Delta$ R and SmABC $\Delta$ oriV $\Delta$ R  
1301 with (A) *parB-cerulean* (*oriC*) and *tetO*<sub>120</sub> array integration at SMc01205 (*terC*) (B) *parB-cerulean* (*oriC*), *tetO*<sub>120</sub> array integration  
1302 at the Sma2383 - Sma2385 intergenic region (*oriA*) and *lacO*<sub>120</sub> array integration at the SMb20041 - SMb20042 intergenic region  
1303 (*oriB*), (C) *parB-cerulean* (*oriC*), *tetO*<sub>120</sub> array integration at the Sma2383 - Sma2385 intergenic region (*oriA*) and *lacO*<sub>120</sub> array  
1304 integration at Sma1188 (*terA*), (D) *parB-cerulean* (*oriC*), *lacO*<sub>120</sub> array integration at the SMb20041 - SMb20042 intergenic region  
1305 (*oriB*) and *tetO*<sub>120</sub> array integration at SMb21555 (*terB*). Expected fragment sizes for SmCre $\Delta$ hsdR derivatives (3.65, 1.35, 1.15,

1306 0.53 Mbp), SmAB $\Delta$ R derivatives (3.65, 1.67, 0.83, 0.53 Mbp), SmABC $\Delta$ R derivatives (2.53, 1.94, 1.67, 0.53 Mbp) and  
1307 SmABC $\Delta$ oriV $\Delta$ R derivatives (2.53, 1.94, 1.67, 0.53 Mbp). M: PFGE marker *S. cerevisiae*, Biorad.

1308 **S19 Fig. Visualization of single cell time lapse data focusing on localization of *oriC/oriA/oriB* and *oriC/terC* regions in**  
1309 **SmCre $\Delta$ hdsR (wt) during the cell cycle. (A)** Trajectories of simultaneously tagged *oriC* (ParB-Cerulean), *oriA* (TetR-mVenus)  
1310 and *oriB* (LacI-mCherry) regions in mother cells (M, upper plots) and daughter cells (D, lower plots). **(B)** Trajectories of *oriC*  
1311 (ParB-cerulean) and *terC* (TetR-mVenus) regions in M and D-cells. Shown is the relative positions within the cell with old pole at  
1312 0 and new pole at 1. Color code: chromosome (grey), pSymA (green), pSymB (blue). Origins are represented as circles and terminus  
1313 regions as diamonds.

1314 **S20 Fig. Visualization of single cell time lapse data focusing on localization of *oriC/oriA/terA* and *oriC/oriB/terB* regions in**  
1315 **SmCre $\Delta$ hdsR (wt) during the cell cycle. (A)** Trajectories of simultaneously tagged *oriC* (ParB-Cerulean), *oriA* (TetR-mVenus)  
1316 and *terA* (LacI-mCherry) regions in mother cells (M, upper plots) and daughter cells (D, lower plots). **(B)** Trajectories of *oriC*  
1317 (ParB-cerulean), *oriB* (LacI-mCherry) and *terB* (TetR-mVenus) regions in M and D-cells. Shown is the relative positions within  
1318 the cell with old pole at 0 and new pole at 1. Color code: chromosome (grey), pSymA (green), pSymB (blue). Origins are  
1319 represented as circles and terminus regions as diamonds.

1320 **S21 Fig. Visualization of single cell time lapse data focusing on localization of *oriC/oriA/oriB* and *oriC/terC* regions in**  
1321 **SmAB $\Delta$ R during the cell cycle. (A)** Trajectories of simultaneously tagged *oriC* (ParB-Cerulean), *oriA* (TetR-mVenus) and *oriB*  
1322 (LacI-mCherry) regions in mother cells (M, upper plots) and daughter cells (D, lower plots). **(B)** Trajectories of *oriC* (ParB-  
1323 cerulean) and *terC* (TetR-mVenus) regions in M and D-cells. Shown is the relative positions within the cell with old pole at 0 and  
1324 new pole at 1. Color code: chromosome (grey), pSymA (green), pSymB (blue). Origins are represented as circles and terminus  
1325 regions as diamonds.

1326 **S22 Fig. Visualization of single cell time lapse data focusing on localization of *oriC/oriA/terA* and *oriC/oriB/terB* regions in**  
1327 **SmAB $\Delta$ R during the cell cycle. (A)** Trajectories of simultaneously tagged *oriC* (ParB-Cerulean), *oriA* (TetR-mVenus) and *terA*  
1328 (LacI-mCherry) regions in mother cells (M, upper plots) and daughter cells (D, lower plots). **(B)** Trajectories of *oriC* (ParB-  
1329 cerulean), *oriB* (LacI-mCherry) and *terB* (TetR-mVenus) regions in M and D-cells. Shown is the relative positions within the cell  
1330 with old pole at 0 and new pole at 1. Color code: chromosome (grey), pSymA (green), pSymB (blue). Origins are represented as  
1331 circles and terminus regions as diamonds.

1332 **S23 Fig. Visualization of single cell time lapse data focusing on localization of *oriC/oriA/oriB* and *oriC/terC* regions in**  
1333 **SmABC $\Delta$ R during the cell cycle. (A)** Trajectories of simultaneously tagged *oriC* (ParB-Cerulean), *oriA* (TetR-mVenus) and *oriB*  
1334 (LacI-mCherry) regions in mother cells (M, upper plots) and daughter cells (D, lower plots). **(B)** Trajectories of *oriC* (ParB-  
1335 cerulean) and *terC* (TetR-mVenus) regions in M and D-cells. Shown is the relative positions within the cell with old pole at 0 and  
1336 new pole at 1. Color code: chromosome (grey), pSymA (green), pSymB (blue). Origins are represented as circles and terminus  
1337 regions as diamonds.

1338 **S24 Fig. Visualization of single cell time lapse data focusing on localization of *oriC/oriA/terA* and *oriC/oriB/terB* regions in**  
1339 **SmABC $\Delta$ R during the cell cycle. (A)** Trajectories of simultaneously tagged *oriC* (ParB-Cerulean), *oriA* (TetR-mVenus) and *terA*  
1340 (LacI-mCherry) regions in mother cells (M, upper plots) and daughter cells (D, lower plots). **(B)** Trajectories of *oriC* (ParB-  
1341 cerulean), *oriB* (LacI-mCherry) and *terB* (TetR-mVenus) regions in M and D-cells. Shown is the relative positions within the cell  
1342 with old pole at 0 and new pole at 1. Color code: chromosome (grey), pSymA (green), pSymB (blue). Origins are represented as  
1343 circles and terminus regions as diamonds.

1344 **S25 Fig. Visualization of single cell time lapse data focusing on localization of *oriC/ΔoriA/ΔoriB* and *oriC/terC* regions in**  
1345 **SmABC $\Delta$ oriV $\Delta$ R during the cell cycle. (A)** Trajectories of simultaneously tagged *oriC* (ParB-Cerulean),  $\Delta$ *oriA* (TetR-mVenus)  
1346 and  $\Delta$ *oriB* (LacI-mCherry) regions in mother cells (M, upper plots) and daughter cells (D, lower plots). **(B)** Trajectories of *oriC*  
1347 (ParB-cerulean) and *terC* (TetR-mVenus) regions in M and D-cells. Shown is the relative positions within the cell with old pole at  
1348 0 and new pole at 1. Color code: chromosome (grey), pSymA (green), pSymB (blue). Origins are represented as circles and terminus  
1349 regions as diamonds.

1350 **S26 Fig. Visualization of single cell time lapse data focusing on localization of *oriC/ΔoriA/terA* and *oriC/ΔoriB/terB* regions**  
1351 **in SmABC $\Delta$ oriV $\Delta$ R during the cell cycle. (A)** Trajectories of simultaneously tagged *oriC* (ParB-Cerulean),  $\Delta$ *oriA* (TetR-  
1352 mVenus) and *terA* (LacI-mCherry) regions in mother cells (M, upper plots) and daughter cells (D, lower plots). **(B)** Trajectories of  
1353 *oriC* (ParB-cerulean),  $\Delta$ *oriB* (LacI-mCherry) and *terB* (TetR-mVenus) regions in M and D-cells. Shown is the relative positions  
1354 within the cell with old pole at 0 and new pole at 1. Color code: chromosome (grey), pSymA (green), pSymB (blue). Origins are  
1355 represented as circles and terminus regions as diamonds.

1356 **S27 Fig. Timepoint of visual segregation of origin and terminus foci in SmCre $\Delta$ hdsR (wt), SmAB (AB), SmABC (ABC) and**  
1357 **SmABC $\Delta$ oriV $\Delta$ R (ABC $\Delta$ ) daughter cells [D].** Bar chart depicting the timepoint of visual foci segregation within the *S. meliloti*



1358 cell cycle normalized to 100 % (0 % - cell cycle start, 100 % - cell cycle completed). Bars are indicative for the standard deviation  
1359 (SD) with the mean as black centered lines.

1360 **S28 Fig. Localization of origin and terminus foci segregation in SmCreΔhsdR (wt), SmAB (AB), SmABC (ABC) and**  
1361 **SmABCΔoriVΔR (ABCΔ) daughter cells [D].** Bar chart depicting the longitudinal position of visual foci segregation within the  
1362 *S. meliloti* cell normalized to 1 (0 - old pole, 1 - new pole). Bars are indicative for the standard deviation (SD) with the mean as  
1363 black centered lines.

1364 **S29 Fig. oriA and oriB segregation.** (A) Scatter plot with timing of the *oriA* and *oriB* segregation events post *oriC* segregation in  
1365 the SmCreΔhsdR (wild type), SmABΔR (AB), SmABCΔR (ABC) and SmABCΔoriVΔR (ABCΔ) subdivided in mother and  
1366 daughter cells (n=100 each). Black line depict the mean values of the plot data. (B) Microscopy images of cells with simultaneously  
1367 segregating *oriA/ΔoriA* and *oriB/ΔoriB* foci within the chosen time lapse settings (5 minutes intervals between the individual  
1368 images). Arrowheads depict the localization of *oriA/ΔoriA* (yellow) and *oriB/ΔoriB* (red) before (upper panel) and after (lower  
1369 panel) the segregation event. Scale bar: 1 μm. C: Percentage of cells per strain (n=200 each) with simultaneous and consecutive  
1370 occurring segregation event.

1371 **S30 Fig. Comparison of oriC, oriA/ΔoriA and oriB/ΔoriB distribution in SmCreΔhsdR (wt), SmABΔR, SmABCΔR and**  
1372 **SmABCΔoriVΔR.** Violin plots depicts the normalized distance of the individual origin regions to the cell center (cell poles: 1 and  
1373 -1, cell center: 0). Plots are based on snapshot analysis of G<sub>1</sub>-phase cells filtered by size with a cut-off of 2.0 μm. Wild type (n=639),  
1374 SmABΔR (n=460), SmABCΔR (n=405) and SmABCΔoriVΔR (n=246).

1375 **S31 Fig. Origin co-localization scheme for SmCreΔhsdR (wt), SmABΔR, SmABCΔR and SmABCΔoriVΔR.** The scheme  
1376 depict the distribution pattern of *oriA/ΔoriA* (green spots) *oriB/ΔoriB* (blue spots) and *oriC* (grey spots) in relation to each other.  
1377 Therefore, cells were divided into four compartments (1 to 0.5, 0.5 to 0, 0 to -0.5 and -0.5 to -1). Cells analyzed: SmCreΔhsdR (wt)  
1378 (n=639), SmABΔR (n=460), SmABCΔR (n=405) and SmABCΔoriVΔR (n=246).

1379 **S32 Fig. oriC localization pattern in SmABCΔoriVΔR cells after one cell-division cycle.** Depicted are the percentage of the  
1380 predominant *oriC* positions in the next generation of sibling cells emerging from either sibling 1 (grey) or sibling 2 (white). Cells  
1381 analyzed: n=80.

1382 **S33 Fig. Analysis of CckA<sup>R436H</sup> in S. meliloti wild type and genome fusion strains.** (A) Schematic illustration of functional  
1383 domains of CckA predicted by Pfam, COG and SMART via NCBI CDD (Marchler-Bauer et al., 2011, 2015 and 1017). The red  
1384 line depicts the position of the missense mutation R436H. (B) Density map of *oriC* (ParB-cerulean) localization in predivisional  
1385 sibling cells of SmCreΔhsdR (wt) and SmABCΔR with original and mutagenized *cckA*. (C) Percentage of predivisional sibling  
1386 cells of SmCreΔhsdR (wt) and SmABCΔR with either both *oriCs* located at the poles (lower picture and values) or with at least  
1387 one *oriC* focus located in the midcell area (upper picture and values). (D) Growth curves of SmCreΔhsdR (wt) and SmABCΔR  
1388 with original CckA compared to the respective strains with CckA<sup>R436H</sup>. (E) Growth comparison of SmABCΔoriVΔR with the  
1389 precursor strain SmABCΔoriV and SmABCΔoriVΔR with *parB::cerulean* fusion.

1390 **S1 Table. Underlying data of S16B Fig.** Mean and standard deviation (SD) of the relative longitudinal positions of fluorescent  
1391 foci within analyzed cells of SmABCΔR and the wild type. Old cell pole at 1, new cell pole at -1.

1392 **S2 Table. Timepoint of origin and terminus foci segregation in SmCreΔhsdR (wt), SmABΔR, SmABCΔR and**  
1393 **SmABCΔoriVΔR mother cells [M].** Corresponding values to Fig.5A (main manuscript). Mean and standard deviation (SD) of  
1394 corresponding origin / *repABΔC* (*ΔoriA* or *ΔoriB*) and terminus foci segregation normalized to a cell cycle duration of 100 % (0  
1395 % - cell cycle start, 100 % - cell cycle completed) in cells analyzed (n).

1396 **S3 Table. Localization of origin and terminus foci segregation in SmCreΔhsdR (wt), SmAB, SmABC and SmABCΔoriVΔR**  
1397 **mother cells [M].** Corresponding values to Fig.5B. Mean and standard deviation (SD) of the relative longitudinal position of  
1398 corresponding origin/ *repABΔC* (*ΔoriA* or *ΔoriB*) and terminus foci segregation normalized to 1 (0 - old pole (OP), 1 - new pole  
1399 (NP)) within cells analyzed (n).

1400 **S4 Table. Values corresponding to S27 Fig.** Mean and standard deviation (SD) of origin / *repABΔC* (*ΔoriA* or *ΔoriB*) and  
1401 terminus foci segregation normalized to a cell cycle duration of 100 % (0 % - cell cycle start, 100 % - cell cycle completed) in cells  
1402 analyzed (n).

1403 **S5 Table. Values corresponding to S28 Fig.** Mean and standard deviation (SD) of the relative longitudinal position of  
1404 corresponding origin/ *repABΔC* (*ΔoriA* or *ΔoriB*) and terminus foci segregation normalized to 1 (0 - old pole, 1 - new pole) within  
1405 cells analyzed (n).

1406 **S6 Table. Coding sequences that were removed or truncated upon the replicon fusion procedure.** For details on the individual  
1407 fusion site (FS) please refer to S1 Fig and S2 Fig.

- 1408 **S7 Table. Single nucleotide variations associated with the fusion procedure.** Reference positions refer to the genome of  
1409 *S. meliloti* SmCre $\Delta$ hsdR which was used as the reference for the basic variant detection analysis. CDS: coding sequence, \*  
1410 paralogue, MBOAT: membrane bound O-acyl transferase
- 1411 **S8 Table. Single nucleotide variations and nucleotide deletions in *S. meliloti* genome fusion strains.** Reference positions refer  
1412 to the genome of *S. meliloti* SmCre $\Delta$ hsdR which was used as the reference for the basic variant detection analysis. Red highlighted  
1413 row represents the SNV which lead to the missense mutation R436H in CckA (S33 Fig). CDS: coding sequence, IGR: intergenic  
1414 region.
- 1415 **S9 Table. Bacterial strains used in this study.**
- 1416 **S10 Table. Plasmids used in this study.**
- 1417 **S11 Table. Construction of *S. meliloti* replicon fusion strains and derivatives.**
- 1418 **S12 Table. Plasmid construction.**
- 1419 **S13 Table. Oligonucleotides used in this study.**
- 1420 **S1 Text. Model of compacted DNA.**
- 1421 **S2 Text. Monte Carlo sampling of configuration space.**
- 1422 **S3 Text. SI References.**
